# Supplementary material for: The kinesin spindle protein inhibitor filanesib enhances the activity of pomalidomide and dexamethasone in multiple myeloma
Source: PubMed Central journal article supplement — Haematologica. 2017 Aug 31;102(12):2113–24. doi: 10.3324/haematol.2017.168666 (PMC5709111; doi:10.3324/haematol.2017.168666), 2017-12
Supplement: 2017.168666.HERNANDEZ-GARCIA_SUPPl.pdf [file 2017.168666.HERNANDEZ-GARCIA_SUPPl.pdf]

## The kinesin spindle protein inhibitor filanesib enhances the activity of pomalidomide and dexamethasone in multiple myeloma

Susana Hernández-García,<sup>1</sup> Laura San-Segundo,<sup>1</sup> Lorena González-Méndez,<sup>1</sup> Luis A. Corchete,<sup>1</sup> Irena Misiewicz-Krzeminska,<sup>1,2</sup> Montserrat Martín-Sánchez,<sup>1</sup> Ana-Alicia López-Iglesias,<sup>1</sup> Esperanza Macarena Algarín,<sup>1</sup> Pedro Mogollón,<sup>1</sup> Andrea Díaz-Tejedor,<sup>1</sup> Teresa Paíno,<sup>1</sup> Brian Tunquist,<sup>3</sup> María-Victoria Mateos,<sup>1</sup> Norma C Gutiérrez,<sup>1</sup> Elena Díaz-Rodríguez,<sup>1</sup> Mercedes Garayoa<sup>1\*</sup> and Enrique M Ocio<sup>1\*</sup>

<sup>1</sup>Centro Investigación del Cáncer-IBMCC (CSIC-USAL) and Hospital Universitario-IBSAL, Salamanca, Spain; <sup>2</sup>National Medicines Institute, Warsaw, Poland and <sup>3</sup>Array BioPharma, Boulder, Colorado, USA

*\*MG and EMO contributed equally to this work*

©2017 Ferrata Storti Foundation. This is an open-access paper. doi:10.3324/haematol.2017.168666

Received: March 13, 2017.

Accepted: August 29, 2017.

Pre-published: August 31, 2017.

Correspondence: emocio@usal.es

---

## **MATERIAL AND METHODS**

**Reagents and drugs.** Filanesib (F) was provided by Array BioPharma Inc. (Boulder, CO, USA). Thalidomide (T), lenalidomide (L) and pomalidomide (P) were purchased from Selleckchem (Houston, TX, USA), dexamethasone (D) from Sigma-Aldrich (St Louis, MO, USA) and bortezomib from LC Laboratories (Woburn, MA, USA). Generic chemicals were acquired from Sigma Chemical Co., Roche Biochemicals (Mannheim, Germany), Merck & Co., Inc. (Darmstadt, Germany).

**MM cell lines, patient samples and cultures.** Origin, authentication and *in vitro* growth conditions of human MM cell lines have already been characterized (17, 18). The study of drug activity in the presence of IL-6, IGF-1 or in co-culture with primary bone marrow mesenchymal stromal cells (BMSCs) or the human mesenchymal stromal cell line (hMSC-TERT) was performed as described previously (19, 20).

**Cell viability, cell cycle and apoptosis assays.** Cell viability of MM cells after exposure to drugs was evaluated by the MTT assay (21). The half-maximal inhibitory concentration (IC<sub>50</sub>) of the drug or drug combination was calculated using SigmaPlot graphing software. The cell cycle profile, apoptosis induction and mitochondrial membrane potential were evaluated using the Annexin V-FITC / Propidium iodide kit provided by Immunostep (Salamanca, Spain), Draq5 from Biostatus (Leicestershire, UK) and tetramethylrhodamine ethyl ester (TMRE) from Invitrogen (ThermoFisher Scientific, Waltham MA, USA), following the manufacturers' instructions. Cell acquisition and data analysis were performed as previously described (20).

**Quantification of *in vitro* synergism.** Synergism was evaluated using CalcuSyn

software (22) (Biosoft, Ferguson, MO, USA), which calculates a combination index (CI) with the following interpretation:  $CI > 1$ : antagonistic effect,  $CI = 1$ : additive effect and  $CI < 1$ : synergistic effect.

**Immunofluorescence study to quantify monopolar spindles *in vitro*.** MM.1S cells were plated on poly-L-lysine-coated coverslips, allowed to recover overnight and then treated with PD, F or PDF or control vehicle for 24 h. After fixation in cold methanol for 5 min, cells were blocked and permeabilized in a 5% bovine serum albumin (BSA) 0.01% Tween 20 containing solution, and incubated overnight with a monoclonal primary anti- $\alpha$ -tubulin antibody (Sigma). Coverslips were washed before staining with Alexa Fluor 488 conjugated anti-mouse IgG secondary antibody (Life Technologies, Thermo Fisher Scientific, Waltham, MA, USA). Finally, coverslips were briefly incubated in a DAPI solution (Sigma) to identify nuclei, and mounted in Vectashield medium. The number of monopolar spindles was evaluated in at least 10 randomly selected fields with the 63x objective. At least 100 cells were counted for each treatment.

**Western blot.** Isolation of total protein or nuclear, cytosolic and mitochondrial protein fractions, as well as western blot procedures were performed as described (23). Primary antibodies used in western blot were purchased from Santa Cruz Biotechnology (anti-Mcl-1; Santa Cruz, CA, USA), Calbiochem (anti-cytochrome C; Billerica, MA, USA). All other antibodies were purchased from Cell Signaling Technology (Boston, MA, USA). Horseradish peroxidase-conjugated secondary antibodies were acquired from GE Healthcare (Little Chalfont, UK).

**Gene silencing with siRNA.** MM.1S cells were transiently transfected with either 100 nM non-targeting control short interfering RNA (NT-siRNA) or 100 nM ON

TARGET plus SMART pool siRNA targeting human BAX (Bax-siRNA; Dharmacon, Lafayette, CO, USA) using the Nucleofector II system (Lonza, Allendale, NJ, USA). After 24-48 h of siRNA transfection, diminished Bax expression was confirmed by western blot.

**Animal models.** In the human subcutaneous plasmacytoma model, CB17- SCID mice (The Jackson Laboratory, Bar Harbor, ME, USA) were subcutaneously injected into the right flank with  $3 \times 10^6$  MM.1S cells that had been resuspended in 100  $\mu$ L of RPMI-1640 medium and 100  $\mu$ L of Matrigel (BD Biosciences, San Jose, CA, USA). When tumors became palpable, mice were randomized to the control group (receiving the vehicle alone-PBS) or the different treatment groups. Tumor volume was measured with calipers, and changes in volume and clinical signs in the mice were monitored as previously described (20, 24). Animal experiments were conducted according to institutional guidelines for the use of Laboratory Animals and after acquiring permission from the local Ethical Committee for Animal Experimentation of the University of Salamanca.

**Histological and immunohistochemistry (IHC) analyses.** Representative tumor fractions were fixed in formalin, paraffin-embedded, cut into 3- $\mu$ m sections, and either stained with hematoxylin and eosin or prepared for IHC, which was performed as previously described (24). For Bax staining, a primary anti-Bax antibody was used (Cell Signaling, Boston, MA, USA), together with the EnVision anti-mouse/rabbit peroxidase complexes (Dako, Glostrup, Denmark). Peroxidase activity was identified using the 3,3'-diaminobenzidine MAPO system (Ventana Medical Systems, Roche, Tucson, AZ, USA). Finally, sections were subsequently counterstained with hematoxylin and analyzed by standard light microscopy.

TUNEL (Terminal deoxynucleotidyl transferase dUTP nick end labeling) was

performed using the In Situ Cell Death Detection Kit (Roche, Mannheim, Germany). Sections were counterstained with DAPI and data were visualized by confocal laser microscopy (Leica TCS SP2). The number of TUNEL<sup>+</sup> cells were evaluated in 10 randomly selected fields with the 60x objective for each experimental condition. These procedures were carried out by independent personnel of the Comparative Pathology Unit of our center. Disagreements between measurements were resolved by consensus.

### **RNA isolation, cDNA synthesis and microarray hybridization and analysis.**

Tumors and MM1.S cells (n=3 for each treatment) were homogenized in RLT Plus buffer (Qiagen). Total RNA was isolated using an RNeasy Plus Mini Kit (Qiagen), column-purified (Qiagen, RNeasy mini kit) and processed for hybridization of Human Gene 2.0 ST arrays (Affymetrix) following the manufacturer's instructions. The raw intensity data were preprocessed using the RMA algorithm (25) implemented in the Affymetrix Expression Console, version 1.4.1.46. Differentially expressed genes were identified using the significance analysis of microarrays (SAM) algorithm (26), version 4.01, selecting all genes with a value of  $q < 0.05$ . Data were mined to identify ontological categories (GO, Gene Ontology) that were significantly altered with respect to control at biological process level 5 in samples treated with PD, F and PDF using the DAVID Database (<https://david.ncifcrf.gov/>). Microarray data are available through the GEO repository database (Accession number GSE94341).

**Statistical analyses.** Statistical analyses were performed with IBM SPSS Statistics v.21.0 (IBM Corp., Armonk, NY, USA).

**Thalidomide + Dexamethasone + Filanesib**

CI For experimental values

| T<br>(nM) | D<br>(nM) | F<br>(nM) | Fa       | CI    |
|-----------|-----------|-----------|----------|-------|
| 25000     | 2.5       | 0.2       | 0.464092 | 0.435 |
| 50000     | 5         | 0.4       | 0.554807 | 0.390 |
| 100000    | 10        | 0.8       | 0.763846 | 0.112 |

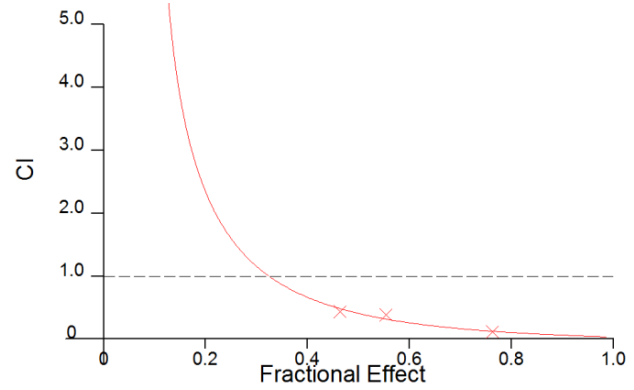

**Lenalidomide + Dexamethasone + Filanesib**

CI For experimental values

| L<br>(nM) | D<br>(nM) | F<br>(nM) | Fa       | CI    |
|-----------|-----------|-----------|----------|-------|
| 125       | 2.5       | 0.2       | 0.580561 | 0.189 |
| 250       | 5         | 0.4       | 0.636008 | 0.217 |
| 500       | 10        | 0.8       | 0.775603 | 0.103 |

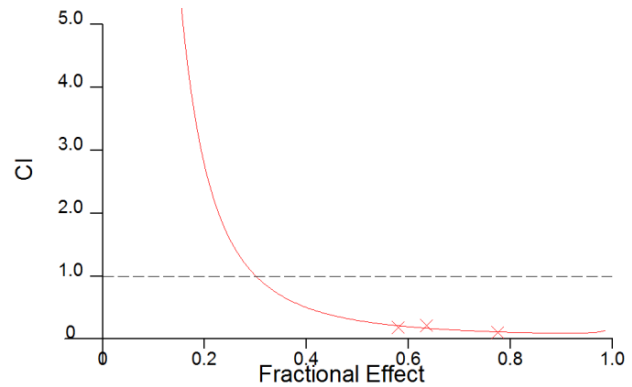

**Pomalidomide + Dexamethasone + Filanesib**

CI For experimental values

| P<br>(nM) | D<br>(nM) | F<br>(nM) | Fa       | CI    |
|-----------|-----------|-----------|----------|-------|
| 125       | 2.5       | 0.2       | 0.666667 | 0.095 |
| 250       | 5         | 0.4       | 0.775603 | 0.051 |
| 500       | 10        | 0.8       | 0.816699 | 0.063 |

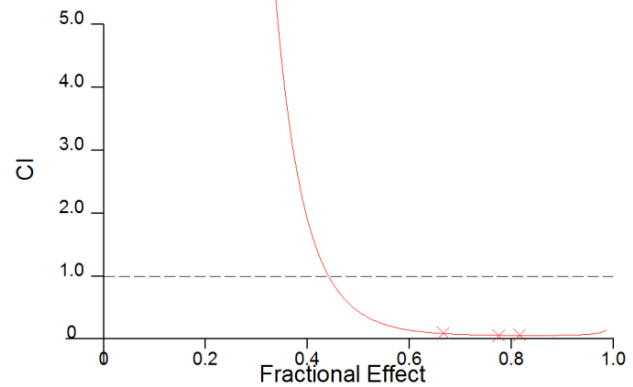

**Synergism analysis of the triple combinations TDF, LDF and PDF on the MM.1S cell line using a constant ratio combination design.** In the left panel, doses and units used for each drug, together with the obtained fractional effect or fraction of cells affected (Fa) and the combination indexes (CI) calculated by the Calcsyn software for each combination data point is given. For the PDF and LDF combinations, a constant ratio of 62.5 : 1.25 : 0.1 was used; for the TDF combination, the constant ratio between drugs was 12500 : 1.25 : 0.1. On the right panel, the Fa-CI plot is shown for each triple combination, since the Calcsyn program allows an algebraic estimation of the CIs along the Fa when using the constant ratio drug combination design. In these Fa-CI plots, CIs obtained for experimental data points are shown.

A

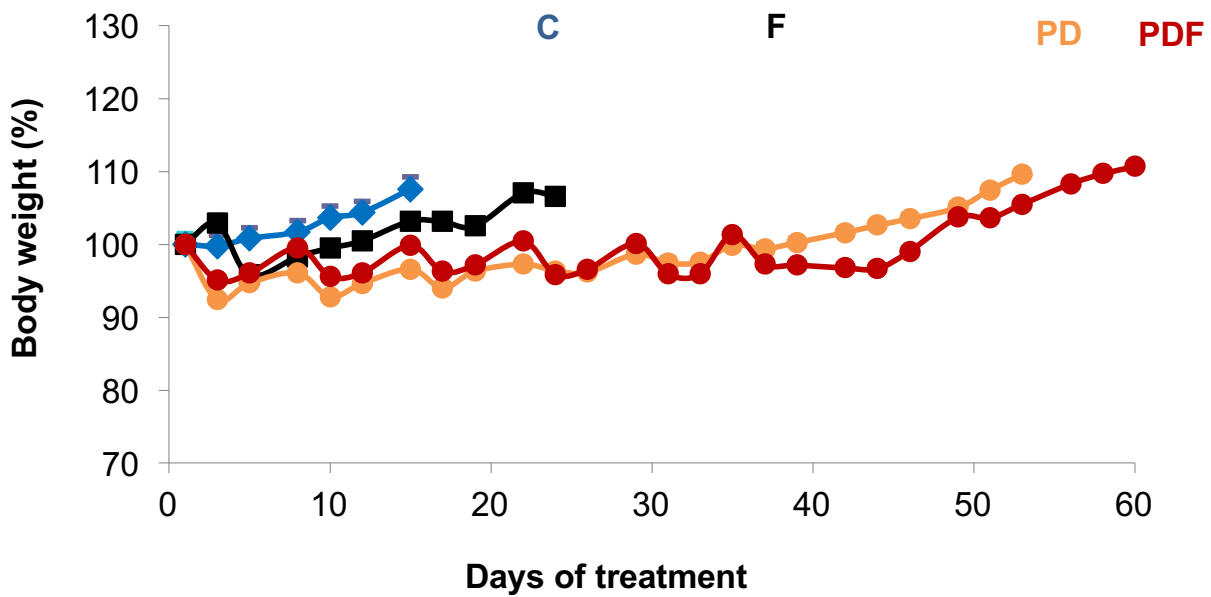

B

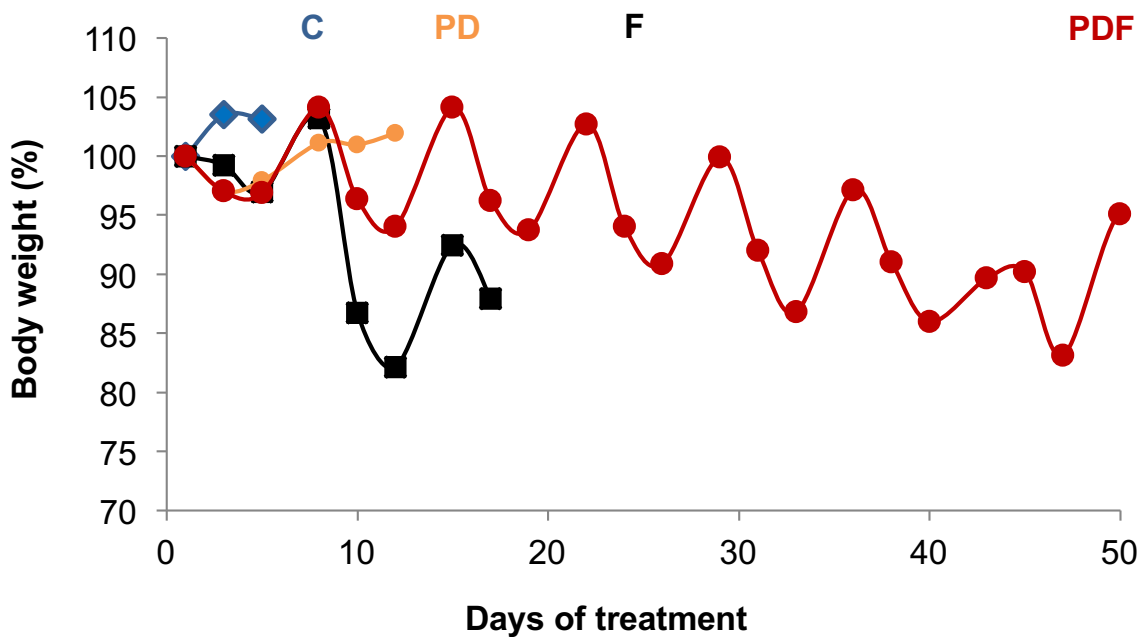

**Effect of intraperitoneal administration of PDF on body weight in xenograft mouse models of MM.** A & B) Average body weight of mice with small (mean volume around 125 mm<sup>3</sup>) (A) or large (mean volume around 2500 mm<sup>3</sup>) (B) plasmacytomas monitored over the treatment period. The percentage weight at each day of treatment was calculated considering day 1 for control mice (C) as 100%. Data are expressed as the mean  $\pm$  SEM.

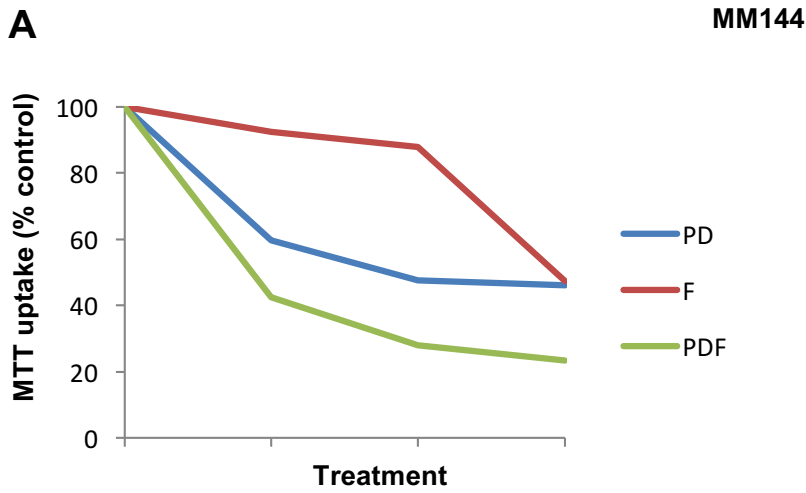

CI For experimental values

| P (nM) | D (nM) | F (nM) | Fa      | CI    |
|--------|--------|--------|---------|-------|
| 62.5   | 1.25   | 0.15   | 0.57395 | 0.220 |
| 125    | 2.5    | 0.3    | 0.72003 | 0.293 |
| 250    | 5      | 0.3    | 0.76631 | 0.511 |

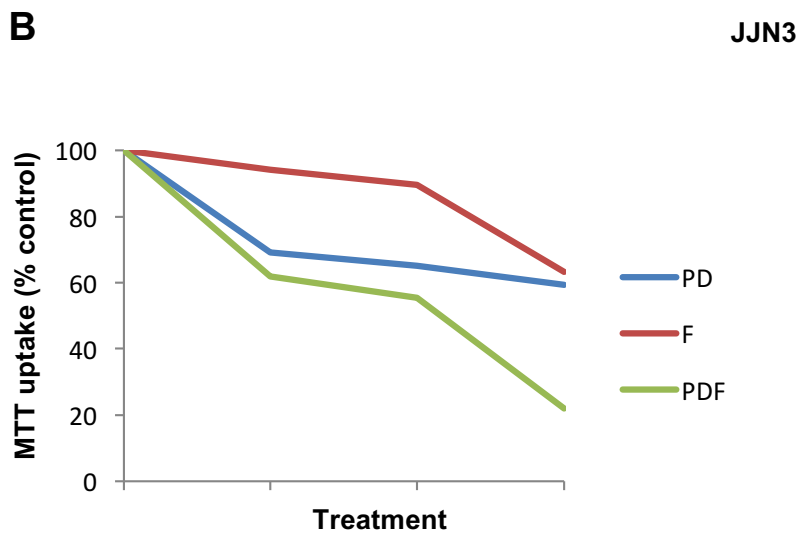

CI For experimental values

| P (nM) | D (nM) | F (nM) | Fa      | CI      |
|--------|--------|--------|---------|---------|
| 62.5   | 1.25   | 0.15   | 0.37984 | 201.485 |
| 125    | 2.5    | 0.3    | 0.44550 | 17.610  |
| 250    | 5      | 0.3    | 0.78000 | 0.452   |

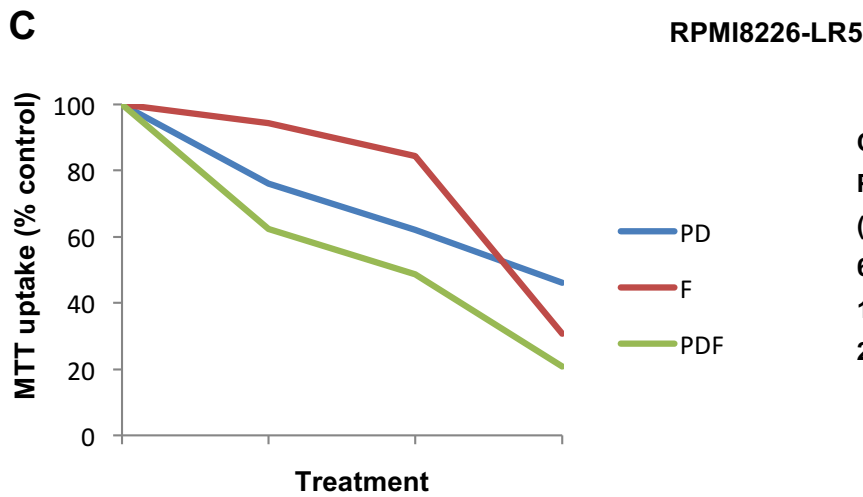

CI For experimental values

| P (nM) | D (nM) | F (nM) | Fa      | CI    |
|--------|--------|--------|---------|-------|
| 62.5   | 1.25   | 0.15   | 0.37681 | 0.392 |
| 125    | 2.5    | 0.3    | 0.51206 | 0.606 |
| 250    | 5      | 0.3    | 0.79188 | 0.684 |

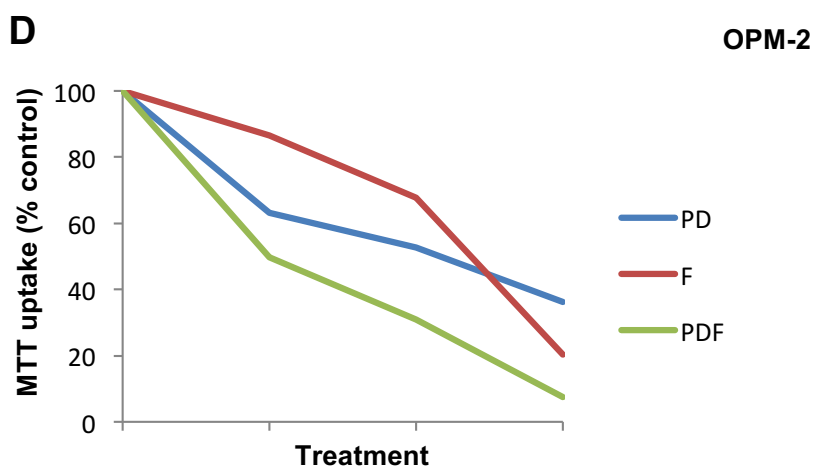

CI For experimental values

| P (nM) | D (nM) | F (nM) | Fa      | CI    |
|--------|--------|--------|---------|-------|
| 62.5   | 1.25   | 0.15   | 0.50241 | 0.376 |
| 125    | 2.5    | 0.3    | 0.69024 | 0.469 |
| 250    | 5      | 0.3    | 0.92516 | 0.356 |



**Supplementary Figure 3. Activity and synergism analysis of the PDF combination** on the MM144 (A), JLN3 (B), RPMI8226-LR5 (C) and OPM-2 (D) cell lines. For each cell line, the activity of the triple combination with the indicated doses the drugs for each data point as assessed by MTT assay after 48 hours of culture is shown in the left handside. Note that a constant ratio drug combination design of 62.5 : 1.25 : 0.15 is maintained for the PDF combination. On the right handside, the correspondent CI values calculated by the Calcsyn program for each data point are also shown.

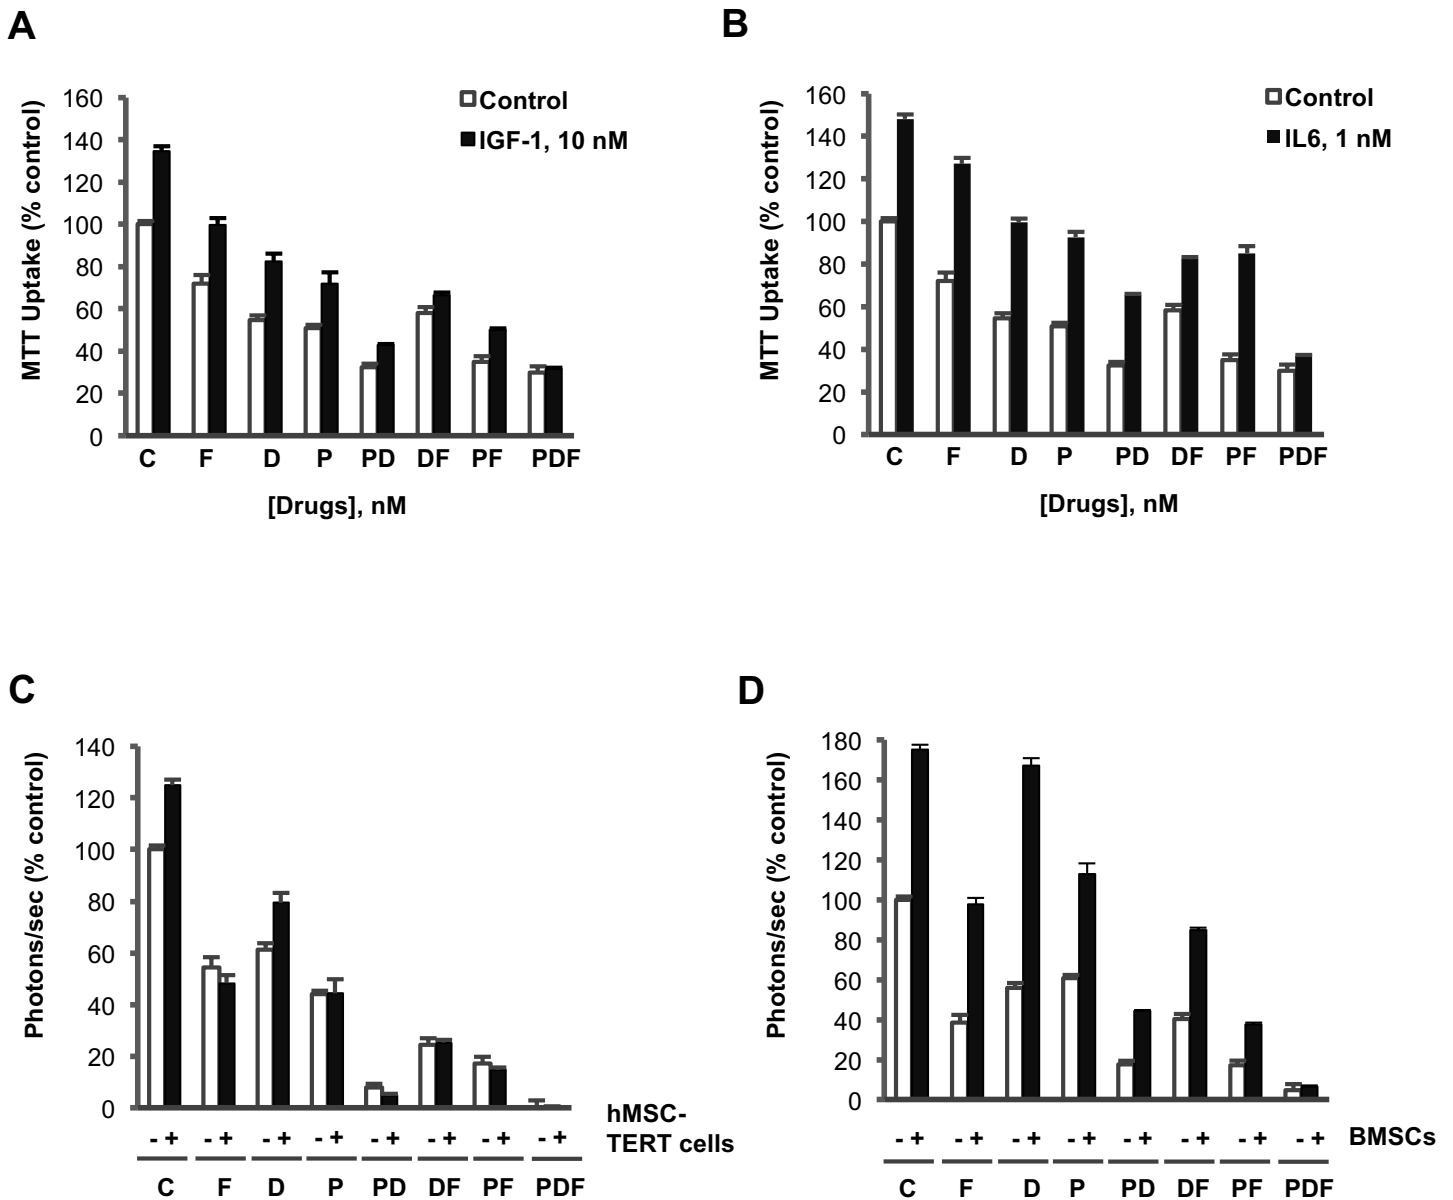

**PDF overcomes the protective effects of growth factors and stroma.** A & B) Cell viability was analyzed by MTT metabolism in MM.1S cells preincubated with 10 nM IGF-1 (A) or 1 nM IL-6 (B) and then cultured with the indicated conditions for 48 h. C & D) Bioluminescence signal of MM.1S-Luc cells treated for 48 h at indicated conditions in the presence or absence of either hMSC-TERT cells (C) or BMSCs (D) determined by bioluminescence after luciferin addition. Data are summarized as the mean  $\pm$  SD (n=4). Results are shown as a percentage of control.

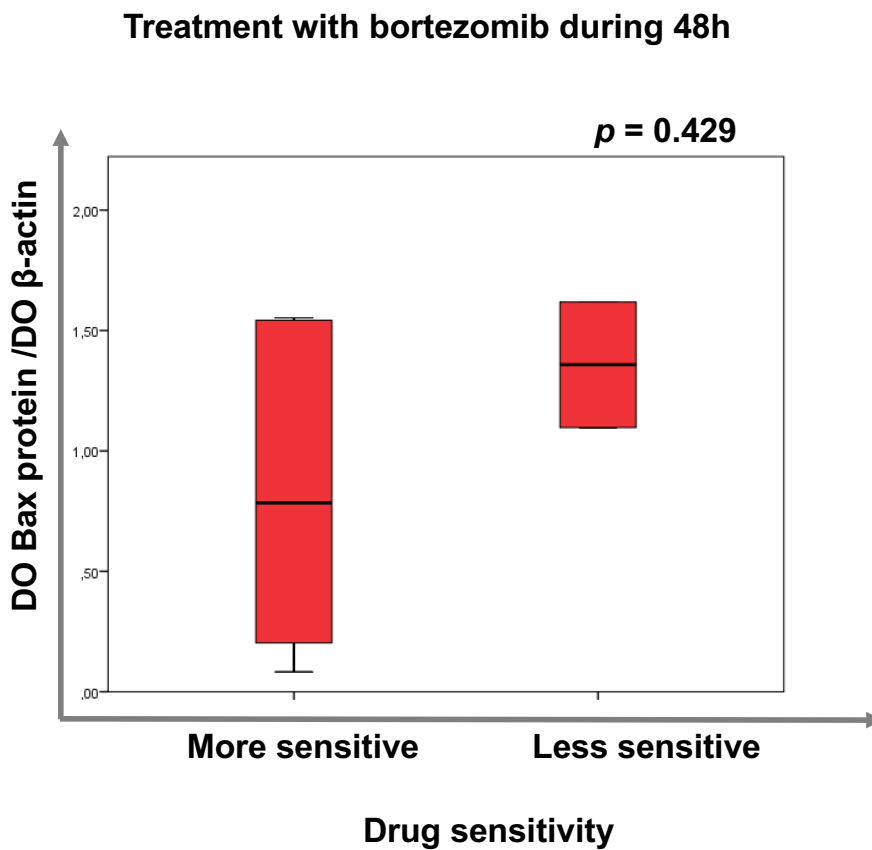

**Bortezomib efficacy was not dependent on basal Bax protein levels.** Relation between basal levels of Bax protein (determined by densitometry of bands using imageJ software and using levels of  $\beta$ -actin as loading control) and drug sensitivity to bortezomib was estimated according to IC50 for 48 h with  $p < 0.05$  (Mann-Whitney U test).

## Supplementary Tables

**Supplementary Table 1.** List of the most (top 100) differentially deregulated genes for the PDF treatment *in vitro* vs the control condition ordered by q-value. Gene identification and fold change with respect to control are given (78/100 genes were upregulated -red- and 22/100 were downregulated -green-).

| Position<br>(by q-<br>value) | Affimetrix<br>probe set | Gene Symbol         | Gene Title                                                                | Fold<br>Change |
|------------------------------|-------------------------|---------------------|---------------------------------------------------------------------------|----------------|
| 1                            | 16705961                | DDIT4               | DNA-damage-inducible transcript 4                                         | 24,5686        |
| 2                            | 17010760                | NT5E                | 5'-nucleotidase, ecto (CD73)                                              | 5,2666         |
| 3                            | 17113362                | CAPN6               | calpain 6                                                                 | 5,6308         |
| 4                            | 16889636                | BMPR2               | bone morphogenetic protein receptor, type II<br>(serine/threonine kinase) | 5,5188         |
| 5                            | 16749583                | FAR2                | fatty acyl CoA reductase 2                                                | 5,4656         |
| 6                            | 16947173                | MME                 | membrane metallo-endopeptidase                                            | 4,2176         |
| 7                            | 17010354                | CD109               | CD109 molecule                                                            | 5,5590         |
| 8                            | 17018497                | FKBP5               | FK506 binding protein 5                                                   | 3,2047         |
| 9                            | 16874339                | RRAS                | related RAS viral (r-ras) oncogene homolog                                | 6,4109         |
| 10                           | 16676693                | PFKFB2              | 6-phosphofructo-2-kinase/fructose-2,6-biphosphatase 2                     | 3,6761         |
| 11                           | 16904425                | GRB14               | growth factor receptor-bound protein 14                                   | 3,2670         |
| 12                           | 16833327                | SLFN5               | schlafen family member 5                                                  | 4,3888         |
| 13                           | 16712086                | ITGA8               | integrin, alpha 8                                                         | -3,3440        |
| 14                           | 16705011                | DKK1                | dickkopf WNT signaling pathway inhibitor 1                                | 4,5034         |
| 15                           | 17112349                | CYSLTR1             | cysteinyl leukotriene receptor 1                                          | 5,3958         |
| 16                           | 16662623                | ZC3H12A             | zinc finger CCCH-type containing 12A                                      | 3,2980         |
| 17                           | 16897026                | ZFP36L2             | ZFP36 ring finger protein-like 2                                          | 3,0419         |
| 18                           | 16947715                | SERPINI1            | serpin peptidase inhibitor, clade I (neuroserpin), member 1               | 4,2268         |
| 19                           | 16676183                | ATP2B4              | ATPase, Ca <sup>++</sup> transporting, plasma membrane 4                  | 4,5334         |
| 20                           | 16927283                | USP41               | ubiquitin specific peptidase 41                                           | 3,4967         |
| 21                           | 17012804                | MYB                 | v-myb myeloblastosis viral oncogene homolog (avian)                       | -2,8656        |
| 22                           | 16807324                | BMF                 | Bcl2 modifying factor                                                     | 4,0062         |
| 23                           | 16998850                | EPB41L4A            | erythrocyte membrane protein band 4.1 like 4A                             | 3,2604         |
| 24                           | 16830577                | CD68 ///<br>SNORA67 | CD68 molecule /// small nucleolar RNA, H/ACA box 67                       | 2,7473         |
| 25                           | 17024079                | MAP3K5              | mitogen-activated protein kinase kinase kinase 5                          | 3,0983         |
| 26                           | 17004167                | IRF4                | interferon regulatory factor 4                                            | -2,5559        |
| 27                           | 16673191                | PBX1                | pre-B-cell leukemia homeobox 1                                            | 2,6468         |
| 28                           | 17022529                | WASF1               | WAS protein family, member 1                                              | 5,6603         |
| 29                           | 16855898                | CBLN2               | cerebellin 2 precursor                                                    | -5,6554        |

|    |          |                          |                                                                                                                                |         |
|----|----------|--------------------------|--------------------------------------------------------------------------------------------------------------------------------|---------|
| 30 | 17066083 | PDGFRL                   | platelet-derived growth factor receptor-like                                                                                   | 3,1682  |
| 31 | 16694617 | IQGAP3                   | IQ motif containing GTPase activating protein 3                                                                                | 3,2017  |
| 32 | 16799357 | EIF2AK4                  | eukaryotic translation initiation factor 2 alpha kinase 4                                                                      | 2,3497  |
| 33 | 16881031 | ANTXR1                   | anthrax toxin receptor 1                                                                                                       | 3,4873  |
| 34 | 16843602 | CCL3L3                   | chemokine (C-C motif) ligand 3-like 3                                                                                          | -2,9111 |
| 35 | 17087588 | MSANTD3<br>///<br>TMEFF1 | Myb/SANT-like DNA-binding domain containing 3 ///<br>transmembrane protein with EGF-like and two follistatin-like<br>domains 1 | -2,5071 |
| 36 | 16881069 | ANXA4                    | annexin A4                                                                                                                     | 2,8551  |
| 37 | 16804490 | ISG20                    | interferon stimulated exonuclease gene 20kDa                                                                                   | 2,6911  |
| 38 | 17062280 | AASS                     | aminoadipate-semialdehyde synthase                                                                                             | 2,9670  |
| 39 | 16715361 | P4HA1                    | prolyl 4-hydroxylase, alpha polypeptide I                                                                                      | 2,8670  |
| 40 | 16851427 | CABLES1                  | Cdk5 and Abl enzyme substrate 1                                                                                                | -2,4560 |
| 41 | 16849349 | TMC6 ///<br>TNRC6C-AS1   | transmembrane channel-like 6 /// TNRC6C antisense RNA 1                                                                        | 2,9446  |
| 42 | 16961806 | GNB4                     | guanine nucleotide binding protein (G protein), beta<br>polypeptide 4                                                          | 2,4425  |
| 43 | 16963241 | TFRC                     | transferrin receptor (p90, CD71)                                                                                               | -2,2769 |
| 44 | 17078558 | PAG1                     | phosphoprotein associated with glycosphingolipid<br>microdomains 1                                                             | 2,1537  |
| 45 | 16873007 | ETHE1                    | ethylmalonic encephalopathy 1                                                                                                  | 2,5653  |
| 46 | 16683445 | FUCA1                    | fucosidase, alpha-L- 1, tissue                                                                                                 | 2,6554  |
| 47 | 17113147 | TSC22D3                  | TSC22 domain family, member 3                                                                                                  | 3,1506  |
| 48 | 16688339 | WLS                      | wntless homolog (Drosophila)                                                                                                   | 2,1945  |
| 49 | 16718719 | KIAA1598                 | KIAA1598                                                                                                                       | 2,4298  |
| 50 | 16781168 | LOC440149                | uncharacterized LOC440149                                                                                                      | 2,9906  |
| 51 | 16933398 | CRYBB1                   | crystallin, beta B1                                                                                                            | -2,1842 |
| 52 | 16977052 | CXCL10                   | chemokine (C-X-C motif) ligand 10                                                                                              | -4,4776 |
| 53 | 16706200 | VCL                      | vinculin                                                                                                                       | 2,7055  |
| 54 | 16982147 | CCDC110                  | coiled-coil domain containing 110                                                                                              | -2,7509 |
| 55 | 16743091 | FZD4                     | frizzled family receptor 4                                                                                                     | 2,9608  |
| 56 | 16843578 | CCL3                     | chemokine (C-C motif) ligand 3 /// c-C motif chemokine 3-like                                                                  | -2,4436 |
| 57 | 16690566 | SORT1                    | sortilin 1                                                                                                                     | 2,2137  |
| 58 | 16676343 | MDM4                     | Mdm4 p53 binding protein homolog (mouse)                                                                                       | 3,5764  |
| 59 | 16773662 | ALOX5AP                  | arachidonate 5-lipoxygenase-activating protein                                                                                 | 2,9648  |
| 60 | 16732386 | OAF                      | OAF homolog (Drosophila)                                                                                                       | -1,9394 |
| 61 | 17085760 | MAMDC2                   | MAM domain containing 2                                                                                                        | 2,2349  |
| 62 | 16938562 | TGFBR2                   | transforming growth factor, beta receptor II (70/80kDa)                                                                        | 2,3666  |
| 63 | 17086193 | PSAT1                    | phosphoserine aminotransferase 1                                                                                               | -2,5800 |
| 64 | 16663033 | SMAP2                    | small ArfGAP2                                                                                                                  | 2,1630  |
| 65 | 16849238 | RHBDF2                   | rhomboid 5 homolog 2 (Drosophila)                                                                                              | 2,4000  |
| 66 | 16944665 | DTX3L                    | deltex 3-like (Drosophila)                                                                                                     | 2,3204  |
| 67 | 16749398 | STK38L                   | serine/threonine kinase 38 like                                                                                                | -2,2405 |
| 68 | 16834766 | GRN                      | granulin                                                                                                                       | 2,2726  |

|     |          |                  |                                                                                                   |         |
|-----|----------|------------------|---------------------------------------------------------------------------------------------------|---------|
| 69  | 16862118 | LGALS17A         | Charcot-Leyden crystal protein pseudogene                                                         | -3,1969 |
| 70  | 16836214 | TOM1L1           | target of myb1 (chicken)-like 1                                                                   | 2,5848  |
| 71  | 16833876 | GRB7             | growth factor receptor-bound protein 7                                                            | 2,0959  |
| 72  | 16729128 | SERPINH1         | serpin peptidase inhibitor, clade H (heat shock protein 47), member 1, collagen binding protein 1 | 2,5906  |
| 73  | 16987531 | ERAP2            | endoplasmic reticulum aminopeptidase 2                                                            | 2,0616  |
| 74  | 16668582 | CD53             | CD53 molecule                                                                                     | 2,1044  |
| 75  | 16929529 | TOM1             | target of myb1 (chicken)                                                                          | 2,2001  |
| 76  | 16879721 | EPAS1            | endothelial PAS domain protein 1                                                                  | 2,3965  |
| 77  | 16869643 | GIPC1            | GIPC PDZ domain containing family, member 1                                                       | 2,1892  |
| 78  | 16836528 | YPEL2            | yippee-like 2 (Drosophila)                                                                        | 2,2656  |
| 79  | 16836697 | BCAS3            | breast carcinoma amplified sequence 3                                                             | 2,0897  |
| 80  | 16903140 | CXCR4            | chemokine (C-X-C motif) receptor 4                                                                | 2,0658  |
| 81  | 16999245 | PPIC             | peptidylprolyl isomerase C (cyclophilin C)                                                        | 2,1949  |
| 82  | 16692918 | FAM63A           | family with sequence similarity 63, member A                                                      | 2,0728  |
| 83  | 16934045 | PIK3IP1          | phosphoinositide-3-kinase interacting protein 1                                                   | 2,9113  |
| 84  | 16849379 | TK1              | thymidine kinase 1, soluble                                                                       | 2,0123  |
| 85  | 16834395 | TUBG2            | tubulin, gamma 2                                                                                  | 2,4750  |
| 86  | 16801557 | CCNB2            | cyclin B2                                                                                         | 1,9254  |
| 87  | 16716918 | BLNK             | B-cell linker                                                                                     | 2,0808  |
| 88  | 16987125 | POLR3G           | polymerase (RNA) III (DNA directed) polypeptide G (32kD)                                          | -2,5603 |
| 89  | 16825154 | ARHGAP17         | Rho GTPase activating protein 17                                                                  | 2,2649  |
| 90  | 16769144 | SYCP3            | synaptonemal complex protein 3                                                                    | -2,4411 |
| 91  | 17023658 | MOXD1            | monooxygenase, DBH-like 1                                                                         | 2,5144  |
| 92  | 16903090 | MCM6             | minichromosome maintenance complex component 6                                                    | -2,0534 |
| 93  | 16687352 | LRP8             | low density lipoprotein receptor-related protein 8, apolipoprotein e receptor                     | -2,2047 |
| 94  | 16841852 | FLCN ///<br>PLD6 | folliculin /// phospholipase D family, member 6                                                   | -2,0191 |
| 95  | 16968735 | HERC6            | HECT and RLD domain containing E3 ubiquitin protein ligase family member 6                        | 2,2178  |
| 96  | 16674973 | C1orf21          | chromosome 1 open reading frame 21                                                                | 2,0368  |
| 97  | 16669796 | TXNIP            | thioredoxin interacting protein /// thioredoxin-interacting protein-like                          | 2,3283  |
| 98  | 16875297 | TMC4             | transmembrane channel-like 4                                                                      | 1,9228  |
| 99  | 16949759 | HES1             | hairy and enhancer of split 1, (Drosophila)                                                       | -2,3674 |
| 100 | 16886564 | FMNL2            | formin-like 2                                                                                     | 2,3134  |

**Supplementary Table 2.** List of the most differentially deregulated genes for the PDF treatment in mouse tumors with respect to control tumors ordered by q-value. Gene identification and fold change with respect to control are given (44/100 genes were upregulated -red- and 56/100 were downregulated -green-).

| Position (by q-value) | Affimetrix probe set | Gene Symbol           | Gene Title                                                                                                                              | Fold change |
|-----------------------|----------------------|-----------------------|-----------------------------------------------------------------------------------------------------------------------------------------|-------------|
| 1                     | 17061881             | DOCK4                 | dedicator of cytokinesis 4                                                                                                              | 2,4679      |
| 2                     | 16797421             | IGHG1 ///<br>IGHD2-21 | immunoglobulin heavy constant gamma 1 (G1m marker)                                                                                      | -3,5417     |
| 3                     | 16830202             | XAF1                  | XIAP associated factor 1                                                                                                                | 3,1376      |
| 4                     | 16687618             | DHCR24                | 24-dehydrocholesterol reductase                                                                                                         | -2,4940     |
| 5                     | 17104939             | LOC100506745          | protein shisa-5-like                                                                                                                    | 1,6968      |
| 6                     | 16944695             | PARP14                | poly (ADP-ribose) polymerase family, member 14                                                                                          | 2,5951      |
| 7                     | 17053892             | INSIG1                | insulin induced gene 1                                                                                                                  | -2,0825     |
| 8                     | 16764758             | GALNT6                | UDP-N-acetyl-alpha-D-galactosamine:polypeptide N-acetylgalactosaminyltransferase 6 (GalNAc-T6)                                          | -1,6764     |
| 9                     | 16691245             | AMPD1                 | adenosine monophosphate deaminase 1                                                                                                     | -2,6988     |
| 10                    | 16761269             | CLEC7A                | C-type lectin domain family 7, member A                                                                                                 | 1,5083      |
| 11                    | 16798919             | ARHGAP11A             | Rho GTPase activating protein 11A                                                                                                       | 1,7493      |
| 12                    | 16785483             | FUT8 /// FUT8-<br>AS1 | fucosyltransferase 8 (alpha (1,6) fucosyltransferase) ///<br>FUT8 antisense RNA 1                                                       | 1,4881      |
| 13                    | 16693187             | TDRKH                 | tudor and KH domain containing                                                                                                          | 1,7296      |
| 14                    | 16966285             | UCHL1 /               | ubiquitin carboxyl-terminal esterase L1 (ubiquitin thiolesterase) /// ubiquitin carboxyl-terminal esterase L1 (ubiquitin thiolesterase) | -1,7271     |
| 15                    | 16800962             | SLC27A2               | solute carrier family 27 (fatty acid transporter), member 2                                                                             | -2,2404     |
| 16                    | 16697695             | KIF14                 | kinesin family member 14                                                                                                                | 1,7671      |
| 17                    | 16815918             | TNFRSF17              | tumor necrosis factor receptor superfamily, member 17                                                                                   | -1,5686     |
| 18                    | 16814183             | ARHGDIG               | Rho GDP dissociation inhibitor (GDI) gamma                                                                                              | 2,5266      |
| 19                    | 16741501             | DHCR7                 | 7-dehydrocholesterol reductase                                                                                                          | -1,8235     |
| 20                    | 16911493             | SPTLC3                | serine palmitoyltransferase, long chain base subunit 3                                                                                  | 1,8228      |
| 21                    | 16927790             | IGLC1 ///<br>IGLV3-25 | immunoglobulin lambda constant 1 (Mcg marker)                                                                                           | -1,6779     |
| 22                    | 16698529             | NUCKS1                | nuclear casein kinase and cyclin-dependent kinase substrate 1                                                                           | 1,5015      |
| 23                    | 16799492             | LOC100505573          | uncharacterized LOC100505573                                                                                                            | 1,9582      |
| 24                    | 16927787             | IGLV3-27              | immunoglobulin lambda variable 3-27                                                                                                     | -2,1462     |
| 25                    | 16891107             | WNT10A                | wingless-type MMTV integration site family, member 10A                                                                                  | -1,4580     |
| 26                    | 16799577             | CHST14                | carbohydrate (N-acetylgalactosamine 4-O) sulfotransferase 14                                                                            | -1,8400     |
| 27                    | 17093245             | AQP3                  | aquaporin 3 (Gill blood group)                                                                                                          | -1,6772     |
| 28                    | 16797378             | IGHG1                 | immunoglobulin heavy constant gamma 1 (G1m marker)                                                                                      | -2,2145     |
| 29                    | 16793885             | RAB15                 | RAB15, member RAS oncogene family                                                                                                       | -1,8380     |

|    |          |                    |                                                                      |         |
|----|----------|--------------------|----------------------------------------------------------------------|---------|
| 30 | 16940593 | P4HTM              | prolyl 4-hydroxylase, transmembrane (endoplasmic reticulum)          | -1,4433 |
| 31 | 16708249 | SCD                | stearoyl-CoA desaturase (delta-9-desaturase)                         | -1,9709 |
| 32 | 16844046 | SNORA21 /// RPL23  | small nucleolar RNA, H/ACA box 21 /// ribosomal protein L23          | 1,8872  |
| 33 | 17059932 | PON2               | paraoxonase 2                                                        | 1,5843  |
| 34 | 16924147 | TPTE               | transmembrane phosphatase with tensin homology                       | 2,0554  |
| 35 | 16698984 | NEK2               | NIMA-related kinase 2                                                | 1,6285  |
| 36 | 16896442 | EIF2AK2            | eukaryotic translation initiation factor 2-alpha kinase 2            | 1,6539  |
| 37 | 16844312 | TOP2A              | topoisomerase (DNA) II alpha 170kDa                                  | 1,5883  |
| 38 | 17046094 | RNU1-14P           | RNA, U1 small nuclear 14, pseudogene                                 | 2,5165  |
| 39 | 16943184 | ST3GAL6            | ST3 beta-galactoside alpha-2,3-sialyltransferase 6                   | 1,7729  |
| 40 | 17005368 | ALDH5A1            | aldehyde dehydrogenase 5 family, member A1                           | -1,7486 |
| 41 | 16949759 | HES1               | hairy and enhancer of split 1, (Drosophila)                          | -2,1112 |
| 42 | 16727570 | C11orf80           | chromosome 11 open reading frame 80                                  | -1,6450 |
| 43 | 16770789 | C12orf49           | chromosome 12 open reading frame 49                                  | -1,5616 |
| 44 | 16833488 | MRM1               | mitochondrial rRNA methyltransferase 1 homolog (S. cerevisiae)       | -1,4732 |
| 45 | 16855898 | CBLN2              | cerebellin 2 precursor                                               | -2,0109 |
| 46 | 17042984 | CHST12             | carbohydrate (chondroitin 4) sulfotransferase 12                     | -1,5928 |
| 47 | 16986249 | HMGCR              | 3-hydroxy-3-methylglutaryl-CoA reductase                             | -1,4571 |
| 48 | 16972950 | ANKRD37            | ankyrin repeat domain 37                                             | -1,4140 |
| 49 | 17017935 | HLA-DOB /// TAP2   | major histocompatibility complex, class II, DO beta                  | -1,5440 |
| 50 | 16733989 | MIR210             | microRNA 210                                                         | -1,6391 |
| 51 | 17064135 | PDIA4              | protein disulfide isomerase family A, member 4                       | -1,3672 |
| 52 | 17104049 | MAGED2 /// SNORA11 | melanoma antigen family D, 2 /// small nucleolar RNA, H/ACA box 11   | -2,2135 |
| 53 | 16811638 | SEMA7A             | semaphorin 7A, GPI membrane anchor (John Milton Hagen blood group)   | -1,5388 |
| 54 | 16835672 | ITGA3              | integrin, alpha 3 (antigen CD49C, alpha 3 subunit of VLA-3 receptor) | -1,6387 |
| 55 | 16830577 | CD68 /// SNORA67   | CD68 molecule /// small nucleolar RNA, H/ACA box 67                  | 1,9670  |
| 56 | 16677425 | CENPF              | centromere protein F, 350/400kDa                                     | 1,7347  |
| 57 | 16748620 | ATF7IP             | activating transcription factor 7 interacting protein                | 1,4339  |
| 58 | 16675673 | CAMSAP2            | calmodulin regulated spectrin-associated protein family, member 2    | 1,6086  |
| 59 | 16659140 | PLOD1              | procollagen-lysine, 2-oxoglutarate 5-dioxygenase 1                   | -1,7806 |
| 60 | 16812517 | LOC388152          | golgin A2 pseudogene                                                 | -1,3278 |
| 61 | 16837226 | SNORA38B           | small nucleolar RNA, H/ACA box 38B                                   | -1,9131 |
| 62 | 16711464 | ANKRD16            | ankyrin repeat domain 16                                             | -1,3960 |
| 63 | 16740524 | RNASEH2C           | ribonuclease H2, subunit C                                           | -1,4251 |
| 64 | 16734092 | CEND1              | cell cycle exit and neuronal differentiation 1                       | -1,4207 |
| 65 | 16825779 | SEPT1              | septin 1                                                             | -1,5320 |
| 66 | 16662623 | ZC3H12A            | zinc finger CCCH-type containing 12A                                 | -1,4665 |
| 67 | 16844099 | CACNB1             | calcium channel, voltage-dependent, beta 1 subunit                   | -1,3520 |
| 68 | 16710906 | ZNF511             | zinc finger protein 511                                              | -1,5987 |
| 69 | 16842850 | DHRS13             | dehydrogenase/reductase (SDR family) member 13                       | -1,6364 |
| 70 | 16695268 | IGSF8              | immunoglobulin superfamily, member 8                                 | -1,4159 |



|     |          |                  |                                                                                    |         |
|-----|----------|------------------|------------------------------------------------------------------------------------|---------|
| 71  | 16799690 | SPINT1           | serine peptidase inhibitor, Kunitz type 1                                          | -1,6686 |
| 72  | 16826019 | C16orf58         | chromosome 16 open reading frame 58                                                | -1,5785 |
| 73  | 17086496 | DAPK1            | death-associated protein kinase 1                                                  | -1,5807 |
| 74  | 16686010 | LEPRE1           | leucine proline-enriched proteoglycan (leprecan) 1                                 | -1,4417 |
| 75  | 16661314 | SFN              | stratifin                                                                          | -1,4721 |
| 76  | 16906534 | STAT1            | signal transducer and activator of transcription 1, 91kDa                          | 1,7165  |
| 77  | 16803006 | LOC729739        | peptidylprolyl isomerase A (cyclophilin A) pseudogene                              | 2,0813  |
| 78  | 17102689 | USP9X            | ubiquitin specific peptidase 9, X-linked                                           | 1,3614  |
| 79  | 16911283 | PLCB1            | phospholipase C, beta 1 (phosphoinositide-specific)                                | 1,4544  |
| 80  | 16798801 | ARHGAP11B        | Rho GTPase activating protein 11B                                                  | 1,8806  |
| 81  | 17023484 | ARHGAP18         | Rho GTPase activating protein 18                                                   | 1,3925  |
| 82  | 17045555 | BLVRA            | biliverdin reductase A                                                             | 1,8577  |
| 83  | 16958124 | PARP9            | poly (ADP-ribose) polymerase family, member 9                                      | 2,3008  |
| 84  | 16961806 | GNB4             | guanine nucleotide binding protein (G protein), beta polypeptide 4                 | 1,9562  |
| 85  | 16692452 | NBPF14 /// NBPF8 | neuroblastoma breakpoint family, member 14                                         | 1,9937  |
| 86  | 16759469 | SNORA49          | small nucleolar RNA, H/ACA box 49                                                  | 1,9804  |
| 87  | 17012163 | RNU1-18P         | RNA, U1 small nuclear 18, pseudogene                                               | 2,2760  |
| 88  | 16923031 | MX1              | myxovirus (influenza virus) resistance 1, interferon-inducible protein p78 (mouse) | 1,9884  |
| 89  | 16811994 | PEAK1            | NKF3 kinase family member                                                          | 1,6269  |
| 90  | 16765513 | CBX5             | chromobox homolog 5                                                                | 1,3674  |
| 91  | 17021122 | IBTK             | inhibitor of Bruton agammaglobulinemia tyrosine kinase                             | 1,4665  |
| 92  | 17050797 | CPED1            | cadherin-like and PC-esterase domain containing 1                                  | 1,5166  |
| 93  | 16718800 | RAB11FIP2        | RAB11 family interacting protein 2 (class I)                                       | 1,3790  |
| 94  | 17076346 | PPAPDC1B         | phosphatidic acid phosphatase type 2 domain containing 1B /// NULL                 | -1,3170 |
| 95  | 16803959 | LOC388152        | golgin A2 pseudogene /// chondroitin sulfate proteoglycan 4 pseudogene 8           | -1,2939 |
| 96  | 16825810 | LOC100506928     | uncharacterized LOC100506928                                                       | -1,7497 |
| 97  | 16960647 | DHX36            | DEAH (Asp-Glu-Ala-His) box polypeptide 36                                          | 1,4335  |
| 98  | 16985518 | PIK3R1           | phosphoinositide-3-kinase, regulatory subunit 1 (alpha)                            | 1,4323  |
| 99  | 16858386 | LDLR             | low density lipoprotein receptor                                                   | -1,6679 |
| 100 | 16745236 | H2AFX            | H2A histone family, member X                                                       | -1,4897 |

**Supplementary Table 3.** List of the differentially deregulated genes after PDF treatment *in vitro* involved in mitotic and cell cycle processes. Genes are ordered by the number of “GO Biological processes” in which the genes are involved. Shaded genes are potential candidates mediating PDF effects *in vitro*.

| Position by number of mitotic functions | Affimetrix probe set | Gene symbol  | Gene Title                                                                     | Fold Change |
|-----------------------------------------|----------------------|--------------|--------------------------------------------------------------------------------|-------------|
| 1                                       | 16985599             | CCNB1        | cyclin B1                                                                      | 1,4632      |
| 2                                       | 16730845             | ATM /// NPAT | ataxia telangiectasia mutated /// nuclear protein, ataxia-telangiectasia locus | 1,2661      |
| 3                                       | 17000439             | CDC25C       | cell division cycle 25C                                                        | 1,4680      |
| 4                                       | 16916958             | PCNA         | proliferating cell nuclear antigen                                             | -1,6766     |
| 5                                       | 16931384             | GTSE1        | G-2 and S-phase expressed 1                                                    | 1,3133      |
| 6                                       | 16777502             | CENPJ        | centromere protein J                                                           | -1,2262     |
| 7                                       | 16840732             | TP53         | tumor protein p53                                                              | -1,1606     |
| 8                                       | 16753853             | MDM2         | MDM2 oncogene, E3 ubiquitin protein ligase                                     | -1,1677     |
| 9                                       | 16918445             | E2F1         | E2F transcription factor 1                                                     | -2,0685     |
| 10                                      | 16864244             | PRMT1        | protein arginine methyltransferase 1                                           | -1,6228     |
| 11                                      | 16890915             | RQCD1        | RCD1 required for cell differentiation1 homolog (S. pombe)                     | -1,3821     |
| 12                                      | 17052776             | CASP2        | caspase 2, apoptosis-related cysteine peptidase                                | -1,4116     |
| 13                                      | 16802918             | PML          | promyelocytic leukemia                                                         | 1,3334      |
| 14                                      | 16676150             | BTG2         | BTG family, member 2                                                           | 1,2570      |
| 15                                      | 16856315             | ARID3A       | AT rich interactive domain 3A (BRIGHT-like)                                    | -1,2818     |
| 16                                      | 16818980             | RBL2         | retinoblastoma-like 2 (p130)                                                   | 1,2404      |
| 17                                      | 16858321             | CARM1        | coactivator-associated arginine methyltransferase 1                            | -1,2243     |
| 18                                      | 16776905             | TFDP1        | transcription factor Dp-1                                                      | -1,2753     |
| 19                                      | 16977196             | CNOT6L       | CCR4-NOT transcription complex, subunit 6-like                                 | -1,1786     |
| 20                                      | 16665932             | GADD45A      | growth arrest and DNA-damage-inducible, alpha                                  | -1,1798     |
| 21                                      | 16728261             | CCND1        | cyclin D1                                                                      | -1,6265     |
| 22                                      | 16658192             | TP73         | tumor protein p73                                                              | -1,7339     |
| 23                                      | 17076867             | PRKDC        | protein kinase, DNA-activated, catalytic polypeptide                           | -1,3638     |
| 24                                      | 16684089             | RPA2         | replication protein A2, 32kDa                                                  | -1,2865     |
| 25                                      | 17104578             | FOXO4        | forkhead box O4                                                                | 1,1740      |
| 26                                      | 16968697             | PKD2         | polycystic kidney disease 2 (autosomal dominant)                               | -1,2382     |
| 27                                      | 16850517             | NDC80        | NDC80 kinetochore complex component                                            | 1,3460      |
| 28                                      | 16834056             | CDC6         | cell division cycle 6                                                          | -1,9952     |
| 29                                      | 16877473             | GEN1         | GEN1 Holliday junction 5' flap endonuclease                                    | 1,2656      |
| 30                                      | 16766683             | CDK4         | cyclin-dependent kinase 4                                                      | -1,4386     |
| 31                                      | 16872551             | TGFB1        | transforming growth factor, beta 1                                             | 1,5768      |
| 32                                      | 16677425             | CENPF        | centromere protein F, 350/400kDa                                               | 1,6572      |

|    |          |                   |                                                                                                                                                     |         |
|----|----------|-------------------|-----------------------------------------------------------------------------------------------------------------------------------------------------|---------|
| 33 | 16799426 | BUB1B ///<br>PAK6 | BUB1 mitotic checkpoint serine/threonine kinase B<br>/// p21 protein (Cdc42/Rac)-activated kinase 6                                                 | 1,1930  |
| 34 | 16855697 | VPS4B             | vacuolar protein sorting 4 homolog B ( <i>S. cerevisiae</i> )                                                                                       | 1,2360  |
| 35 | 16927052 | CDC45             | cell division cycle 45                                                                                                                              | -1,4873 |
| 36 | 16697695 | KIF14             | kinesin family member 14                                                                                                                            | 1,3877  |
| 37 | 16802152 | RAB11A            | RAB11A, member RAS oncogene family                                                                                                                  | 1,3172  |
| 38 | 16683644 | SYF2              | SYF2 homolog, RNA splicing factor ( <i>S. cerevisiae</i> )                                                                                          | 1,2579  |
| 39 | 16804902 | BLM               | Bloom syndrome, RecQ helicase-like                                                                                                                  | -1,2068 |
| 40 | 16959325 | TOPBP1            | topoisomerase (DNA) II binding protein 1                                                                                                            | -1,1830 |
| 41 | 16924068 | PRMT2             | protein arginine methyltransferase 2                                                                                                                | 1,5107  |
| 42 | 16939023 | CTDSPL            | CTD (carboxy-terminal domain, RNA polymerase II,<br>polypeptide A) small phosphatase-like                                                           | 1,5173  |
| 43 | 16766767 | CTDSP2            | CTD (carboxy-terminal domain, RNA polymerase II,<br>polypeptide A) small phosphatase 2                                                              | 1,3865  |
| 44 | 17010552 | TTK               | TTK protein kinase                                                                                                                                  | 1,3546  |
| 45 | 16685165 | CLSPN             | claspin                                                                                                                                             | -1,4069 |
| 46 | 16827170 | NAE1              | NEDD8 activating enzyme E1 subunit 1                                                                                                                | -1,2329 |
| 47 | 16868847 | KANK2             | KN motif and ankyrin repeat domains 2                                                                                                               | -1,2421 |
| 48 | 16667037 | CDC7              | cell division cycle 7                                                                                                                               | -1,2438 |
| 49 | 16901755 | BUB1              | BUB1 mitotic checkpoint serine/threonine kinase                                                                                                     | 1,2082  |
| 50 | 16817182 | LCMT1             | leucine carboxyl methyltransferase 1                                                                                                                | 1,1895  |
| 51 | 16682425 | RCC2              | regulator of chromosome condensation 2                                                                                                              | -1,4513 |
| 52 | 17113744 | CUL4B             | cullin 4B                                                                                                                                           | 1,3571  |
| 53 | 16781516 | APEX1             | APEX nuclease (multifunctional DNA repair enzyme) 1<br>/// APEX nuclease (multifunctional DNA repair<br>enzyme) 1                                   | -1,3733 |
| 54 | 16746992 | CCND2             | cyclin D2                                                                                                                                           | -1,3807 |
| 55 | 16948909 | EIF4G1            | eukaryotic translation initiation factor 4 gamma, 1                                                                                                 | -1,2739 |
| 56 | 16834812 | DBF4B             | DBF4 homolog B ( <i>S. cerevisiae</i> )                                                                                                             | 1,2511  |
| 57 | 16760649 | PHB2              | prohibitin 2                                                                                                                                        | -1,1737 |
| 58 | 16673191 | PBX1              | pre-B-cell leukemia homeobox 1 /// uncharacterized<br>LOC100131938                                                                                  | 2,6468  |
| 59 | 16834486 | PSME3             | proteasome (prosome, macropain) activator subunit 3<br>(PA28 gamma; Ki) /// proteasome (prosome,<br>macropain) activator subunit 3 (PA28 gamma; Ki) | -1,4365 |
| 60 | 16793225 | DLGAP5            | discs, large ( <i>Drosophila</i> ) homolog-associated protein 5                                                                                     | 1,4023  |
| 61 | 17053019 | CUL1              | cullin 1                                                                                                                                            | -1,3893 |
| 62 | 16733104 | CHEK1             | checkpoint kinase 1                                                                                                                                 | -1,1916 |
| 63 | 16897026 | ZFP36L2           | ZFP36 ring finger protein-like 2                                                                                                                    | 3,0419  |
| 64 | 16810933 | TIPIN             | TIMELESS interacting protein                                                                                                                        | -2,1573 |
| 65 | 16698984 | NEK2              | NIMA-related kinase 2                                                                                                                               | 1,6175  |
| 66 | 16663514 | CDC20             | cell division cycle 20                                                                                                                              | 1,5784  |
| 67 | 16927198 | RANBP1            | RAN binding protein 1 /// RAN binding protein 1                                                                                                     | -1,4861 |
| 68 | 16912871 | CHMP4B            | charged multivesicular body protein 4B                                                                                                              | -1,2450 |
| 69 | 16843131 | CRLF3             | cytokine receptor-like factor 3                                                                                                                     | -1,2154 |
| 70 | 17088929 | NEK6              | NIMA-related kinase 6                                                                                                                               | -1,2410 |
| 71 | 16869570 | PRKACA            | protein kinase, cAMP-dependent, catalytic, alpha                                                                                                    | 1,2121  |
| 72 | 16949214 | SEN2              | SUMO1/sentrin/SMT3 specific peptidase 2                                                                                                             | -1,1819 |
| 73 | 17070331 | CHMP4C            | charged multivesicular body protein 4C                                                                                                              | 2,3538  |

|     |          |                |                                                                                                                                                                                   |         |
|-----|----------|----------------|-----------------------------------------------------------------------------------------------------------------------------------------------------------------------------------|---------|
| 74  | 16879883 | MSH2           | mutS homolog 2, colon cancer, nonpolyposis type 1 (E. coli)                                                                                                                       | -1,7236 |
| 75  | 16911040 | CDC25B         | cell division cycle 25B                                                                                                                                                           | 1,4458  |
| 76  | 16856959 | FZR1           | fizzy/cell division cycle 20 related 1 (Drosophila)                                                                                                                               | 1,3170  |
| 77  | 16978568 | CENPE          | centromere protein E, 312kDa                                                                                                                                                      | 1,4784  |
| 78  | 16932008 | BID            | BH3 interacting domain death agonist                                                                                                                                              | -1,3007 |
| 79  | 16707221 | KIF20B         | kinesin family member 20B                                                                                                                                                         | 1,2419  |
| 80  | 16846568 | PPP1R9B        | protein phosphatase 1, regulatory subunit 9B /// protein phosphatase 1, regulatory subunit 9B                                                                                     | 1,3048  |
| 81  | 16872089 | SIRT2          | sirtuin 2                                                                                                                                                                         | 1,2545  |
| 82  | 16734475 | CDKN1C         | cyclin-dependent kinase inhibitor 1C (p57, Kip2)                                                                                                                                  | -1,2842 |
| 83  | 16840902 | AURKB          | aurora kinase B                                                                                                                                                                   | 1,1459  |
| 84  | 16912379 | TPX2           | TPX2, microtubule-associated, homolog (Xenopus laevis)                                                                                                                            | 1,3027  |
| 85  | 16708468 | BTRC           | beta-transducin repeat containing E3 ubiquitin protein ligase                                                                                                                     | 1,3250  |
| 86  | 17045198 | ANLN           | anillin, actin binding protein                                                                                                                                                    | 1,2004  |
| 87  | 16799793 | NUSAP1         | nucleolar and spindle associated protein 1                                                                                                                                        | 1,1957  |
| 88  | 16845263 | BECN1          | beclin 1, autophagy related /// beclin 1, autophagy related                                                                                                                       | 1,2025  |
| 89  | 16661589 | RCC1 /// SNHG3 | regulator of chromosome condensation 1 /// small nucleolar RNA host gene 3 (non-protein coding) /// regulator of chromosome condensation 1 /// small nucleolar RNA, H/ACA box 73A | -1,1816 |
| 90  | 16821869 | CDT1           | chromatin licensing and DNA replication factor 1                                                                                                                                  | -1,1822 |
| 91  | 16705942 | ANAPC16        | anaphase promoting complex subunit 16                                                                                                                                             | 1,5602  |
| 92  | 16851022 | CHMP1B         | charged multivesicular body protein 1B                                                                                                                                            | 1,3508  |
| 93  | 16964000 | TACC3          | transforming, acidic coiled-coil containing protein 3                                                                                                                             | 1,3577  |
| 94  | 16770040 | ANAPC7         | anaphase promoting complex subunit 7                                                                                                                                              | -1,1713 |
| 95  | 16760048 | FOXM1          | forkhead box M1                                                                                                                                                                   | 1,1660  |
| 96  | 16802519 | KIF23          | kinesin family member 23                                                                                                                                                          | 1,1471  |
| 97  | 16836214 | TOM1L1         | target of myb1 (chicken)-like 1                                                                                                                                                   | 2,5848  |
| 98  | 16769250 | IGF1           | insulin-like growth factor 1 (somatomedin C)                                                                                                                                      | 1,8607  |
| 99  | 16867915 | INSR           | insulin receptor                                                                                                                                                                  | 1,8113  |
| 100 | 16953279 | CDC25A         | cell division cycle 25A                                                                                                                                                           | -1,6930 |
| 101 | 16844312 | TOP2A          | topoisomerase (DNA) II alpha 170kDa                                                                                                                                               | 1,4734  |
| 102 | 17117724 | PSMD3          | proteasome (prosome, macropain) 26S subunit, non-ATPase, 3 /// uncharacterized LOC100505620                                                                                       | 1,6826  |
| 103 | 16898788 | TGFA           | transforming growth factor, alpha                                                                                                                                                 | 1,5199  |
| 104 | 16821021 | PSMD7          | proteasome (prosome, macropain) 26S subunit, non-ATPase, 7                                                                                                                        | -1,4781 |
| 105 | 16892039 | PSMD1          | proteasome (prosome, macropain) 26S subunit, non-ATPase, 1                                                                                                                        | -1,3538 |
| 106 | 16935228 | PDGFB          | platelet-derived growth factor beta polypeptide                                                                                                                                   | 1,3652  |
| 107 | 16848032 | PSMD12         | proteasome (prosome, macropain) 26S subunit, non-ATPase, 12                                                                                                                       | -1,3750 |
| 108 | 16833139 | PSMD11         | proteasome (prosome, macropain) 26S subunit, non-ATPase, 11                                                                                                                       | -1,4914 |
| 109 | 16814825 | EME2 /         | essential meiotic endonuclease 1 homolog 2 (S. pombe)                                                                                                                             | -1,3249 |
| 110 | 16714504 | ZWINT          | ZW10 interacting kinetochore protein                                                                                                                                              | -1,2939 |
| 111 | 16841982 | TOM1L2         | target of myb1-like 2 (chicken)                                                                                                                                                   | 1,2654  |
| 112 | 16709140 | SMC3           | structural maintenance of chromosomes 3                                                                                                                                           | -1,2786 |

|     |          |               |                                                                                                                             |         |
|-----|----------|---------------|-----------------------------------------------------------------------------------------------------------------------------|---------|
| 113 | 16690594 | PSMA5         | proteasome (prosome, macropain) subunit, alpha type, 5                                                                      | -1,2968 |
| 114 | 16905322 | ATF2          | activating transcription factor 2                                                                                           | 1,2576  |
| 115 | 16835797 | EME1          | essential meiotic endonuclease 1 homolog 1 (S. pombe)                                                                       | 1,2923  |
| 116 | 16886919 | PSMD14        | proteasome (prosome, macropain) 26S subunit, non-ATPase, 14 /// proteasome (prosome, macropain) 26S subunit, non-ATPase, 14 | -1,2337 |
| 117 | 16889807 | CD28          | CD28 molecule                                                                                                               | -1,2173 |
| 118 | 16948871 | PSMD2         | proteasome (prosome, macropain) 26S subunit, non-ATPase, 2                                                                  | -1,2342 |
| 119 | 17007307 | PSMB9         | proteasome (prosome, macropain) subunit, beta type, 9                                                                       | 1,2180  |
| 120 | 17049965 | PSMC2         | proteasome (prosome, macropain) 26S subunit, ATPase, 2                                                                      | -1,2353 |
| 121 | 17090373 | ABL1          | c-abl oncogene 1, non-receptor tyrosine kinase                                                                              | 1,2422  |
| 122 | 16862145 | PSMC4         | proteasome (prosome, macropain) 26S subunit, ATPase, 4                                                                      | -1,1954 |
| 123 | 16738023 | PSMC3         | proteasome (prosome, macropain) 26S subunit, ATPase, 3                                                                      | -1,2191 |
| 124 | 16784642 | PSMA3         | proteasome (prosome, macropain) subunit, alpha type, 3                                                                      | -1,2128 |
| 125 | 17067963 | EIF4EBP1      | eukaryotic translation initiation factor 4E binding protein 1                                                               | -1,2605 |
| 126 | 16670850 | PSMB4         | proteasome (prosome, macropain) subunit, beta type, 4                                                                       | -1,1502 |
| 127 | 16829885 | PSMB6         | proteasome (prosome, macropain) subunit, beta type, 6                                                                       | -1,1718 |
| 128 | 16803540 | PSMA4         | proteasome (prosome, macropain) subunit, alpha type, 4                                                                      | -1,1959 |
| 129 | 16727802 | RAD9A         | RAD9 homolog A (S. pombe) /// uncharacterized LOC100130987                                                                  | -1,1552 |
| 130 | 17079293 | CCNE2         | cyclin E2                                                                                                                   | -1,7937 |
| 131 | 17101622 | OFD1          | oral-facial-digital syndrome 1                                                                                              | 1,5815  |
| 132 | 16984032 | SKP2          | S-phase kinase-associated protein 2, E3 ubiquitin protein ligase                                                            | -1,3950 |
| 133 | 16784299 | CDKN3         | cyclin-dependent kinase inhibitor 3                                                                                         | 1,4047  |
| 134 | 17115077 | CETN2         | centrin, EF-hand protein, 2                                                                                                 | 1,2935  |
| 135 | 16832852 | ATAD5         | ATPase family, AAA domain containing 5                                                                                      | -1,2622 |
| 136 | 16733952 | HRAS /// HRAS | v-Ha-ras Harvey rat sarcoma viral oncogene homolog                                                                          | -1,2267 |
| 137 | 16801557 | CCNB2         | cyclin B2                                                                                                                   | 1,9254  |
| 138 | 16860418 | CCNE1         | cyclin E1                                                                                                                   | -1,7116 |
| 139 | 16840018 | MYBBP1A       | MYB binding protein (P160) 1a                                                                                               | -1,6200 |
| 140 | 16736638 | E2F8          | E2F transcription factor 8                                                                                                  | -1,3603 |
| 141 | 17102230 | POLA1         | polymerase (DNA directed), alpha 1, catalytic subunit                                                                       | -1,3197 |
| 142 | 17019287 | CUL7          | cullin 7                                                                                                                    | 1,3046  |
| 143 | 16766590 | DCTN2         | dynactin 2 (p50)                                                                                                            | 1,2546  |
| 144 | 16744684 | ZNF259        | zinc finger protein 259                                                                                                     | -1,1865 |
| 145 | 16992096 | SPDL1         | spindle apparatus coiled-coil protein 1                                                                                     | 1,2281  |
| 146 | 16877007 | KLF11         | Kruppel-like factor 11                                                                                                      | -1,9137 |
| 147 | 16823512 | TFAP4         | transcription factor AP-4 (activating enhancer binding protein 4)                                                           | -1,4977 |
| 148 | 16687188 | ORC1          | origin recognition complex, subunit 1                                                                                       | -1,5622 |
| 149 | 17104484 | KIF4A         | kinesin family member 4A                                                                                                    | 1,5053  |
| 150 | 16908373 | USP37         | ubiquitin specific peptidase 37                                                                                             | -1,4526 |

|     |          |                   |                                                                                           |         |
|-----|----------|-------------------|-------------------------------------------------------------------------------------------|---------|
| 151 | 16766318 | PRIM1             | primase, DNA, polypeptide 1 (49kDa)                                                       | -1,5116 |
| 152 | 16661117 | CEP85             | centrosomal protein 85kDa                                                                 | -1,3700 |
| 153 | 16815090 | CCNF              | cyclin F                                                                                  | 1,2950  |
| 154 | 16726790 | POLA2             | polymerase (DNA directed), alpha 2, accessory subunit                                     | -1,3007 |
| 155 | 16983412 | FBXL7             | F-box and leucine-rich repeat protein 7                                                   | 1,4379  |
| 156 | 17093480 | DCTN3             | dynactin 3 (p22)                                                                          | 1,3297  |
| 157 | 17038792 | KIFC1             | kinesin family member C1                                                                  | 1,3246  |
| 158 | 17007459 | KIFC1             | kinesin family member C1 /// kinesin family member C1                                     | 1,3267  |
| 159 | 17041352 | KIFC1 /// RPL12P1 | kinesin family member C1                                                                  | 1,3267  |
| 160 | 16666896 | PKN2              | protein kinase N2                                                                         | 1,3515  |
| 161 | 17092688 | HAUS6             | HAUS augmin-like complex, subunit 6                                                       | -1,4165 |
| 162 | 16835272 | KPNB1             | karyopherin (importin) beta 1                                                             | -1,3019 |
| 163 | 16852206 | HAUS1             | HAUS augmin-like complex, subunit 1                                                       | 1,3068  |
| 164 | 16858774 | CALR              | calreticulin                                                                              | -1,1904 |
| 165 | 16850477 | TYMS              | thymidylate synthetase                                                                    | -1,2265 |
| 166 | 16744078 | NPAT              | nuclear protein, ataxia-telangiectasia locus                                              | -1,2213 |
| 167 | 16809506 | ARPP19            | cAMP-regulated phosphoprotein, 19kDa                                                      | -1,1773 |
| 168 | 17086634 | CKS2              | CDC28 protein kinase regulatory subunit 2                                                 | 1,2489  |
| 169 | 16772625 | POLE              | polymerase (DNA directed), epsilon, catalytic subunit                                     | -1,2252 |
| 170 | 17008867 | CUL9              | cullin 9                                                                                  | 1,2387  |
| 171 | 16800108 | HAUS2             | HAUS augmin-like complex, subunit 2                                                       | -1,1776 |
| 172 | 16829764 | GSG2              | germ cell associated 2 (haspin)                                                           | 1,1824  |
| 173 | 16912625 | MAPRE1            | microtubule-associated protein, RP/EB family, member 1                                    | -1,1615 |
| 174 | 16676183 | ATP2B4            | ATPase, Ca <sup>++</sup> transporting, plasma membrane 4                                  | 4,5334  |
| 175 | 16694617 | IQGAP3            | IQ motif containing GTPase activating protein 3                                           | 3,2017  |
| 176 | 16903090 | MCM6              | minichromosome maintenance complex component 6                                            | -2,0534 |
| 177 | 16959668 | CEP70             | centrosomal protein 70kDa                                                                 | 1,9416  |
| 178 | 17020019 | MCM3              | minichromosome maintenance complex component 3                                            | -1,5997 |
| 179 | 16702547 | OPTN              | optineurin                                                                                | 1,5317  |
| 180 | 16702571 | MCM10             | minichromosome maintenance complex component 10                                           | -1,6061 |
| 181 | 17068782 | MCM4              | minichromosome maintenance complex component 4                                            | -1,6929 |
| 182 | 16945101 | MCM2              | minichromosome maintenance complex component 2                                            | -1,6040 |
| 183 | 16976158 | PPAT              | phosphoribosyl pyrophosphate amidotransferase                                             | -1,6920 |
| 184 | 16707551 | CEP55             | centrosomal protein 55kDa                                                                 | 1,4996  |
| 185 | 16818600 | ORC6              | origin recognition complex, subunit 6                                                     | -1,4150 |
| 186 | 17060412 | MCM7              | minichromosome maintenance complex component 7                                            | -1,5393 |
| 187 | 16929573 | MCM5              | minichromosome maintenance complex component 5                                            | -1,5156 |
| 188 | 16799598 | CASC5             | cancer susceptibility candidate 5                                                         | 1,5386  |
| 189 | 16897797 | PNPT1             | polyribonucleotide nucleotidyltransferase 1                                               | -1,5687 |
| 190 | 17058905 | YWHAG             | tyrosine 3-monooxygenase/tryptophan 5-monooxygenase activation protein, gamma polypeptide | -1,3809 |
| 191 | 16911212 | MCM8              | minichromosome maintenance complex component 8                                            | -1,4598 |
| 192 | 16991859 | HMMR              | hyaluronan-mediated motility receptor (RHAMM)                                             | 1,4882  |
| 193 | 16730540 | BIRC2             | baculoviral IAP repeat containing 2                                                       | 1,4471  |

|     |          |                      |                                                                                                                                                      |         |
|-----|----------|----------------------|------------------------------------------------------------------------------------------------------------------------------------------------------|---------|
| 194 | 16850189 | CSNK1D               | casein kinase 1, delta /// casein kinase 1, delta                                                                                                    | 1,2736  |
| 195 | 16994170 | NSUN2                | NOP2/Sun RNA methyltransferase family, member 2                                                                                                      | -1,3563 |
| 196 | 16887601 | DYNC1I2              | dynein, cytoplasmic 1, intermediate chain 2 ///<br>dynein, cytoplasmic 1, intermediate chain 2<br>pseudogene 1                                       | 1,3217  |
| 197 | 16869841 | AKAP8                | A kinase (PRKA) anchor protein 8                                                                                                                     | -1,3131 |
| 198 | 16913957 | MYBL2                | v-myb myeloblastosis viral oncogene homolog<br>(avian)-like 2                                                                                        | -1,2653 |
| 199 | 16903427 | ORC4                 | origin recognition complex, subunit 4                                                                                                                | 1,2915  |
| 200 | 17108546 | BRCC3                | BRCA1/BRCA2-containing complex, subunit 3                                                                                                            | -1,2005 |
| 201 | 17089667 | ODF2                 | outer dense fiber of sperm tails 2                                                                                                                   | 1,2027  |
| 202 | 17066118 | PCM1                 | pericentriolar material 1                                                                                                                            | 1,2752  |
| 203 | 17050154 | PRKAR2B              | protein kinase, cAMP-dependent, regulatory, type II,<br>beta                                                                                         | -1,2736 |
| 204 | 16978387 | PPP3CA               | protein phosphatase 3, catalytic subunit, alpha<br>isozyme                                                                                           | -1,2282 |
| 205 | 16824004 | GSPT1                | G1 to S phase transition 1                                                                                                                           | -1,1956 |
| 206 | 17088589 | CNTRL                | centriolin                                                                                                                                           | -1,3191 |
| 207 | 16869860 | AKAP8L               | A kinase (PRKA) anchor protein 8-like                                                                                                                | 1,1707  |
| 208 | 16762573 | ASUN                 | asunder spermatogenesis regulator                                                                                                                    | -1,2162 |
| 209 | 17065292 | MCPH1                | microcephalin 1                                                                                                                                      | 1,1874  |
| 210 | 16757255 | PTPN11               | protein tyrosine phosphatase, non-receptor type 11                                                                                                   | -1,1684 |
| 211 | 16859454 | BABAM1               | BRISC and BRCA1 A complex member 1 /// BRISC and<br>BRCA1 A complex member 1                                                                         | 1,1937  |
| 212 | 17074571 | PINX1 ///<br>SOX7    | PIN2/TERF1 interacting, telomerase inhibitor 1 ///<br>PIN2/TERF1 interacting, telomerase inhibitor 1 /// SRY<br>(sex determining region Y)-box 7 /// | -1,7907 |
| 213 | 17069545 | RRS1                 | RRS1 ribosome biogenesis regulator homolog (S.<br>cerevisiae)                                                                                        | -1,8081 |
| 214 | 16851121 | SEH1L                | SEH1-like (S. cerevisiae)                                                                                                                            | -1,6177 |
| 215 | 16736891 | KIF18A               | kinesin family member 18A                                                                                                                            | 1,4470  |
| 216 | 16813342 | PRC1                 | protein regulator of cytokinesis 1                                                                                                                   | 1,4497  |
| 217 | 16658664 | SLC25A33             | solute carrier family 25 (pyrimidine nucleotide<br>carrier), member 33                                                                               | -1,5337 |
| 218 | 16662648 | CDCA8                | cell division cycle associated 8                                                                                                                     | 1,3750  |
| 219 | 16877956 | CENPA ///<br>SLC35F6 | centromere protein A /// solute carrier family 35,<br>member F6                                                                                      | 1,2900  |
| 220 | 16800209 | TUBGCP4              | tubulin, gamma complex associated protein 4                                                                                                          | -1,3765 |
| 221 | 16681210 | KLHL21               | kelch-like family member 21                                                                                                                          | -1,3355 |
| 222 | 16702503 | CDC123               | cell division cycle 123                                                                                                                              | -1,2633 |
| 223 | 16663958 | KIF2C                | kinesin family member 2C                                                                                                                             | 1,3087  |
| 224 | 16725735 | FEN1                 | flap structure-specific endonuclease 1                                                                                                               | -1,3229 |
| 225 | 16838359 | BIRC5                | baculoviral IAP repeat containing 5                                                                                                                  | 1,2458  |
| 226 | 17110058 | DYNLT3               | dynein, light chain, Tctex-type 3                                                                                                                    | 1,3286  |
| 227 | 16779720 | MZT1                 | mitotic spindle organizing protein 1                                                                                                                 | -1,2812 |
| 228 | 16995140 | RAD1                 | RAD1 homolog (S. pombe)                                                                                                                              | -1,2788 |
| 229 | 17098808 | GOLGA2               | golgin A2                                                                                                                                            | 1,2481  |
| 230 | 16902411 | BIN1                 | bridging integrator 1                                                                                                                                | 1,1726  |
| 231 | 16781136 | TUBGCP3              | tubulin, gamma complex associated protein 3                                                                                                          | -1,1926 |
| 232 | 16686796 | STIL                 | SCL/TAL1 interrupting locus                                                                                                                          | 1,1698  |
| 233 | 16730522 | BIRC3                | baculoviral IAP repeat containing 3                                                                                                                  | 1,2017  |

|     |          |          |                                                                               |         |
|-----|----------|----------|-------------------------------------------------------------------------------|---------|
| 234 | 16869643 | GIPC1    | GIPC PDZ domain containing family, member 1                                   | 2,1892  |
| 235 | 16949759 | HES1     | hairy and enhancer of split 1, ( <i>Drosophila</i> )                          | -2,3674 |
| 236 | 16945664 | NUDT16   | nudix (nucleoside diphosphate linked moiety X)-type motif 16                  | 2,2200  |
| 237 | 16843376 | NLE1     | notchless homolog 1 ( <i>Drosophila</i> )                                     | -1,4643 |
| 238 | 16957568 | NAA50    | N(alpha)-acetyltransferase 50, NatE catalytic subunit                         | -1,3816 |
| 239 | 16697544 | ASPM     | asp (abnormal spindle) homolog, microcephaly associated ( <i>Drosophila</i> ) | 1,5645  |
| 240 | 16658449 | PHF13    | PHD finger protein 13                                                         | -1,3156 |
| 241 | 16845794 | KIF18B   | kinesin family member 18B                                                     | 1,2869  |
| 242 | 16746379 | NCAPD3   | non-SMC condensin II complex, subunit D3                                      | -1,3057 |
| 243 | 17067410 | FZD3     | frizzled family receptor 3                                                    | -1,3675 |
| 244 | 16991839 | CCNG1    | cyclin G1                                                                     | 1,3014  |
| 245 | 16886757 | PKP4     | plakophilin 4                                                                 | 1,2731  |
| 246 | 16924305 | BTG3     | BTG family, member 3                                                          | -1,2838 |
| 247 | 16747287 | NCAPD2   | non-SMC condensin I complex, subunit D2                                       | 1,2419  |
| 248 | 16984083 | NIPBL    | Nipped-B homolog ( <i>Drosophila</i> )                                        | 1,2540  |
| 249 | 17013072 | HECA     | headcase homolog ( <i>Drosophila</i> )                                        | 1,2521  |
| 250 | 16766137 | TIMELESS | timeless circadian clock                                                      | -1,1973 |
| 251 | 17080595 | DSCC1    | DNA replication and sister chromatid cohesion 1                               | -1,2818 |
| 252 | 16799357 | EIF2AK4  | eukaryotic translation initiation factor 2 alpha kinase 4                     | 2,3497  |
| 253 | 16828886 | GIN52    | GIN5 complex subunit 2 (Psf2 homolog)                                         | -1,9489 |
| 254 | 16802190 | MAP2K1   | mitogen-activated protein kinase kinase 1                                     | 1,7290  |
| 255 | 17072669 | MYC      | v-myc myelocytomatosis viral oncogene homolog (avian)                         | -1,7808 |
| 256 | 16668079 | GPSM2    | G-protein signaling modulator 2                                               | 1,7670  |
| 257 | 16708552 | NOLC1    | nucleolar and coiled-body phosphoprotein 1                                    | -1,7005 |
| 258 | 16687618 | DHCR24   | 24-dehydrocholesterol reductase                                               | -1,5488 |
| 259 | 16721479 | ILK      | integrin-linked kinase                                                        | 1,6867  |
| 260 | 16707695 | HELLS    | helicase, lymphoid-specific                                                   | -1,9358 |
| 261 | 16850063 | STRA13   | stimulated by retinoic acid 13                                                | -1,4507 |
| 262 | 16781285 | GAS6     | growth arrest-specific 6                                                      | 1,5051  |
| 263 | 16936408 | MAPK12   | mitogen-activated protein kinase 12                                           | -1,4710 |
| 264 | 16958812 | RUVBL1   | RuvB-like 1 ( <i>E. coli</i> )                                                | -1,3470 |
| 265 | 16818755 | PAPD5    | PAP associated domain containing 5                                            | -1,5775 |
| 266 | 16950569 | TADA3    | transcriptional adaptor 3                                                     | 1,3184  |
| 267 | 17067102 | CDCA2    | cell division cycle associated 2                                              | 1,3876  |
| 268 | 16987008 | RASA1    | RAS p21 protein activator (GTPase activating protein) 1                       | 1,3267  |
| 269 | 16950146 | LMLN     | leishmanolysin-like (metallopeptidase M8 family)                              | 1,4166  |
| 270 | 16880122 | SPTBN1   | spectrin, beta, non-erythrocytic 1                                            | 1,4163  |
| 271 | 16685596 | RRAGC    | Ras-related GTP binding C                                                     | 1,3558  |
| 272 | 16718983 | MCMBP    | minichromosome maintenance complex binding protein                            | -1,3547 |
| 273 | 16895848 | PPM1G    | protein phosphatase, Mg2+/Mn2+ dependent, 1G                                  | -1,3294 |
| 274 | 16856153 | TXNL4A   | thioredoxin-like 4A /// thioredoxin-like 4A                                   | -1,4108 |
| 275 | 16856463 | STK11    | serine/threonine kinase 11                                                    | 1,2680  |
| 276 | 16814927 | TSC2     | tuberous sclerosis 2 /// tuberous sclerosis 2                                 | 1,3353  |



|     |          |                   |                                                                                                                     |         |
|-----|----------|-------------------|---------------------------------------------------------------------------------------------------------------------|---------|
| 277 | 16989636 | KIF20A            | kinesin family member 20A                                                                                           | 1,3497  |
| 278 | 16775014 | CKAP2             | cytoskeleton associated protein 2                                                                                   | 1,2746  |
| 279 | 16671889 | LAMTOR2           | late endosomal/lysosomal adaptor, MAPK and MTOR activator 2                                                         | 1,2901  |
| 280 | 16959465 | ANAPC13           | anaphase promoting complex subunit 13                                                                               | -1,2918 |
| 281 | 16947904 | SKIL              | SKI-like oncogene                                                                                                   | 1,3348  |
| 282 | 16863243 | MARK4             | MAP/microtubule affinity-regulating kinase 4                                                                        | 1,2753  |
| 283 | 17070381 | LRRCC1            | leucine rich repeat and coiled-coil centrosomal protein 1                                                           | 1,3623  |
| 284 | 16847771 | ERN1              | endoplasmic reticulum to nucleus signaling 1                                                                        | 1,2941  |
| 285 | 16953241 | MAP4              | microtubule-associated protein 4                                                                                    | 1,2887  |
| 286 | 16840262 | NUP88             | nucleoporin 88kDa                                                                                                   | -1,2444 |
| 287 | 16868838 | SPC24             | SPC24, NDC80 kinetochore complex component                                                                          | 1,2866  |
| 288 | 16760621 | CDCA3             | cell division cycle associated 3 /// cell division cycle associated 3                                               | 1,2463  |
| 289 | 16673154 | NUF2              | NUF2, NDC80 kinetochore complex component, homolog ( <i>S. cerevisiae</i> )                                         | 1,2743  |
| 290 | 16800991 | USP8              | ubiquitin specific peptidase 8                                                                                      | 1,2105  |
| 291 | 16697985 | ARL8A             | ADP-ribosylation factor-like 8A                                                                                     | -1,2657 |
| 292 | 17099361 | TSC1              | tuberous sclerosis 1                                                                                                | 1,2335  |
| 293 | 17092852 | KLHL9             | kelch-like family member 9                                                                                          | 1,2663  |
| 294 | 16938271 | KAT2B             | K(lysine) acetyltransferase 2B                                                                                      | 1,2097  |
| 295 | 16807605 | OIP5              | Opa interacting protein 5                                                                                           | 1,2784  |
| 296 | 17021596 | RRAGD             | Ras-related GTP binding D                                                                                           | -1,2248 |
| 297 | 16760546 | ING4              | inhibitor of growth family, member 4                                                                                | 1,3025  |
| 298 | 16951485 | SGOL1             | shugoshin-like 1 ( <i>S. pombe</i> )                                                                                | 1,2402  |
| 299 | 16726925 | SSSCA1            | Sjogren syndrome/scleroderma autoantigen 1                                                                          | -1,2542 |
| 300 | 16847432 | BRIP1             | BRCA1 interacting protein C-terminal helicase 1                                                                     | -1,2150 |
| 301 | 16692297 | PRKAB2            | protein kinase, AMP-activated, beta 2 non-catalytic subunit /// 5'-AMP-activated protein kinase subunit beta-2-like | 1,2324  |
| 302 | 16830839 | CNTROB            | centrobin, centrosomal BRCA2 interacting protein                                                                    | 1,1995  |
| 303 | 17057433 | TBRG4 /// SNORA5B | transforming growth factor beta regulator 4 /// small nucleolar RNA, H/ACA box 5B                                   | -1,2898 |
| 304 | 16939960 | KIF15             | kinesin family member 15                                                                                            | 1,2007  |
| 305 | 16659171 | MFN2              | mitofusin 2                                                                                                         | -1,2024 |
| 306 | 16879408 | EML4              | echinoderm microtubule associated protein like 4                                                                    | 1,2201  |
| 307 | 16673043 | UHMK1             | U2AF homology motif (UHM) kinase 1                                                                                  | -1,1728 |
| 308 | 16935142 | SUN2              | Sad1 and UNC84 domain containing 2                                                                                  | 1,2095  |
| 309 | 16911132 | PRNP              | prion protein                                                                                                       | -1,1875 |
| 310 | 16912192 | GINS1             | GINS complex subunit 1 (Psf1 homolog)                                                                               | -1,1576 |
| 311 | 16691668 | NOTCH2            | notch 2                                                                                                             | 1,2558  |
| 312 | 16794898 | NEK9              | NIMA-related kinase 9                                                                                               | 1,2026  |
| 313 | 16661323 | NUDC              | nuclear distribution C homolog ( <i>A. nidulans</i> )                                                               | -1,1763 |
| 314 | 16851900 | MAPRE2            | microtubule-associated protein, RP/EB family, member 2                                                              | -1,1507 |
| 315 | 16800355 | WDR76             | WD repeat domain 76                                                                                                 | -1,4609 |
| 316 | 16677201 | DTL               | denticleless E3 ubiquitin protein ligase homolog ( <i>Drosophila</i> )                                              | -1,5166 |
| 317 | 16773348 | NUPL1             | nucleoporin like 1                                                                                                  | -1,3900 |
| 318 | 17084796 | TMEM8B            | transmembrane protein 8B                                                                                            | 1,4079  |

|     |          |               |                                                                                                                                 |         |
|-----|----------|---------------|---------------------------------------------------------------------------------------------------------------------------------|---------|
| 319 | 16878556 | WDR43         | WD repeat domain 43                                                                                                             | -1,3830 |
| 320 | 16666835 | SH3GLB1       | SH3-domain GRB2-like endophilin B1                                                                                              | 1,3543  |
| 321 | 17101815 | TXLNG         | taxilin gamma                                                                                                                   | -1,3422 |
| 322 | 16995409 | NUP155        | nucleoporin 155kDa                                                                                                              | -1,3460 |
| 323 | 17089898 | NUP188        | nucleoporin 188kDa                                                                                                              | -1,3945 |
| 324 | 17015889 | NUP153        | nucleoporin 153kDa                                                                                                              | -1,2870 |
| 325 | 17096091 | PTCH1         | patched 1                                                                                                                       | 1,3830  |
| 326 | 17078134 | EYA1          | eyes absent homolog 1 (Drosophila)                                                                                              | 1,2446  |
| 327 | 16856699 | DOT1L         | DOT1-like histone H3K79 methyltransferase                                                                                       | -1,3382 |
| 328 | 16833518 | AATF          | apoptosis antagonizing transcription factor                                                                                     | -1,3220 |
| 329 | 16950932 | NUP210        | nucleoporin 210kDa                                                                                                              | -1,2437 |
| 330 | 16931590 | PIM3          | pim-3 oncogene                                                                                                                  | -1,1965 |
| 331 | 17064679 | XRCC2         | X-ray repair complementing defective repair in Chinese hamster cells 2                                                          | -1,2808 |
| 332 | 16802408 | FEM1B         | fem-1 homolog b (C. elegans)                                                                                                    | 1,1824  |
| 333 | 16738869 | PRPF19        | pre-mRNA processing factor 19                                                                                                   | -1,1841 |
| 334 | 16852098 | PIK3C3        | phosphatidylinositol 3-kinase, catalytic subunit type 3                                                                         | 1,2416  |
| 335 | 16765284 | AAAS          | achalasia, adrenocortical insufficiency, alacrimia                                                                              | -1,1772 |
| 336 | 16702351 | GATA3         | GATA binding protein 3                                                                                                          | 1,8809  |
| 337 | 16666616 | PRKACB        | protein kinase, cAMP-dependent, catalytic, beta                                                                                 | -1,6132 |
| 338 | 16909551 | NPPC          | natriuretic peptide C                                                                                                           | -1,7371 |
| 339 | 16973578 | SLBP          | stem-loop binding protein                                                                                                       | -1,3883 |
| 340 | 17008036 | C6orf89       | chromosome 6 open reading frame 89                                                                                              | 1,3555  |
| 341 | 17023414 | PTPRK         | protein tyrosine phosphatase, receptor type, K                                                                                  | 1,5075  |
| 342 | 16873313 | ERCC1         | excision repair cross-complementing rodent repair deficiency, complementation group 1 (includes overlapping antisense sequence) | 1,3571  |
| 343 | 16881786 | HTRA2         | HtrA serine peptidase 2                                                                                                         | -1,2968 |
| 344 | 16683624 | RUNX3         | runt-related transcription factor 3                                                                                             | -1,4499 |
| 345 | 17005396 | GMNN          | geminin, DNA replication inhibitor                                                                                              | -1,3148 |
| 346 | 16734762 | TRIM21        | tripartite motif containing 21                                                                                                  | 1,2879  |
| 347 | 16834071 | RARA          | retinoic acid receptor, alpha                                                                                                   | 1,3030  |
| 348 | 16680284 | CCNL2         | cyclin L2                                                                                                                       | 1,2381  |
| 349 | 16938899 | MLH1          | mutL homolog 1, colon cancer, nonpolyposis type 2 (E. coli)                                                                     | -1,1777 |
| 350 | 16925239 | DONSON        | downstream neighbor of SON                                                                                                      | -1,1777 |
| 351 | 17012804 | MYB           | v-myb myeloblastosis viral oncogene homolog (avian)                                                                             | -2,8656 |
| 352 | 16851427 | CABLES1       | Cdk5 and Abl enzyme substrate 1                                                                                                 | -2,4560 |
| 353 | 16769144 | SYCP3         | synaptonemal complex protein 3                                                                                                  | -2,4411 |
| 354 | 16841852 | FLCN /// PLD6 | folliculin /// phospholipase D family, member 6 ///                                                                             | -2,0191 |
| 355 | 16845126 | STAT3         | signal transducer and activator of transcription 3 (acute-phase response factor)                                                | 1,8218  |
| 356 | 16693187 | TDRKH         | tudor and KH domain containing                                                                                                  | 1,9796  |
| 357 | 16930707 | MEI1          | meiosis inhibitor 1                                                                                                             | 2,3181  |
| 358 | 16885118 | RALB          | v-ral simian leukemia viral oncogene homolog B (ras related; GTP binding protein)                                               | 1,5882  |
| 359 | 16701748 | GTPBP4        | GTP binding protein 4                                                                                                           | -1,6100 |
| 360 | 16836492 | PRR11         | proline rich 11                                                                                                                 | 1,5534  |
| 361 | 16669389 | PHGDH         | phosphoglycerate dehydrogenase                                                                                                  | -1,5170 |

|     |          |                |                                                                                                      |         |
|-----|----------|----------------|------------------------------------------------------------------------------------------------------|---------|
| 362 | 17080946 | KIAA0196       | KIAA0196                                                                                             | 1,4631  |
| 363 | 16661567 | PHACTR4        | phosphatase and actin regulator 4                                                                    | 1,5002  |
| 364 | 16662134 | RBBP4          | retinoblastoma binding protein 4 /// retinoblastoma binding protein 4 pseudogene 1                   | -1,4231 |
| 365 | 16908604 | CNPPD1         | cyclin Pas1/PHO80 domain containing 1                                                                | 1,5461  |
| 366 | 16829369 | FANCA          | Fanconi anemia, complementation group A                                                              | -1,4768 |
| 367 | 16861200 | LIN37          | lin-37 homolog (C. elegans)                                                                          | 1,6304  |
| 368 | 16722217 | ARNTL          | aryl hydrocarbon receptor nuclear translocator-like                                                  | 1,4248  |
| 369 | 16662430 | AGO4           | argonaute RISC catalytic component 4                                                                 | 1,5187  |
| 370 | 17022588 | CDK19          | cyclin-dependent kinase 19                                                                           | 1,4895  |
| 371 | 16813286 | CIB1           | calcium and integrin binding 1 (calmyrin)                                                            | 1,4220  |
| 372 | 16909958 | PER2           | period circadian clock 2                                                                             | -1,4313 |
| 373 | 16694804 | ARHGEF11       | Rho guanine nucleotide exchange factor (GEF) 11                                                      | 1,4254  |
| 374 | 16879923 | MSH6           | mutS homolog 6 (E. coli)                                                                             | -1,5196 |
| 375 | 16872443 | SERTAD1        | SERTA domain containing 1                                                                            | 1,4736  |
| 376 | 16968765 | HERC5          | HECT and RLD domain containing E3 ubiquitin protein ligase 5                                         | -1,3810 |
| 377 | 16800173 | CCNDBP1        | cyclin D-type binding-protein 1                                                                      | 1,4003  |
| 378 | 17086784 | CENPP /// IPPK | centromere protein P /// inositol 1,3,4,5,6-pentakisphosphate 2-kinase                               | -1,2919 |
| 379 | 17009482 | CENPQ          | centromere protein Q                                                                                 | -1,4359 |
| 380 | 16683358 | E2F2           | E2F transcription factor 2                                                                           | -1,3198 |
| 381 | 17008595 | UBR2           | ubiquitin protein ligase E3 component n-recognin 2                                                   | 1,3182  |
| 382 | 16701440 | AHCTF1         | AT hook containing transcription factor 1 /// AT hook containing transcription factor 1 pseudogene 1 | -1,3381 |
| 383 | 16982635 | TRIP13         | thyroid hormone receptor interactor 13                                                               | -1,2976 |
| 384 | 16674998 | RNF2           | ring finger protein 2                                                                                | -1,3069 |
| 385 | 16921036 | CABLES2        | Cdk5 and Abl enzyme substrate 2                                                                      | -1,3217 |
| 386 | 16839606 | MNT            | MNT, MAX dimerization protein                                                                        | -1,2791 |
| 387 | 17076103 | TEX15          | testis expressed 15                                                                                  | -1,4106 |
| 388 | 16842070 | TOP3A          | topoisomerase (DNA) III alpha                                                                        | -1,2903 |
| 389 | 16742454 | PAK1           | p21 protein (Cdc42/Rac)-activated kinase 1                                                           | 1,2194  |
| 390 | 16979400 | PRDM5          | PR domain containing 5                                                                               | 1,2678  |
| 391 | 16986748 | MSH3           | mutS homolog 3 (E. coli)                                                                             | -1,1882 |
| 392 | 16985614 | CENPH          | centromere protein H                                                                                 | -1,2111 |
| 393 | 17105401 | CENPI          | centromere protein I                                                                                 | 1,2265  |
| 394 | 17067890 | ZNF703         | zinc finger protein 703                                                                              | 1,2442  |
| 395 | 16919044 | RBL1           | retinoblastoma-like 1 (p107)                                                                         | -1,2598 |
| 396 | 16721126 | RRM1           | ribonucleotide reductase M1                                                                          | -1,2163 |
| 397 | 16935517 | CENPM          | centromere protein M                                                                                 | -1,2661 |
| 398 | 16724516 | MADD           | MAP-kinase activating death domain                                                                   | 1,2190  |
| 399 | 16800117 | STARD9         | StAR-related lipid transfer (START) domain containing 9                                              | 1,3175  |
| 400 | 16950017 | PAK2           | p21 protein (Cdc42/Rac)-activated kinase 2                                                           | -1,1876 |
| 401 | 16768857 | CDK17          | cyclin-dependent kinase 17                                                                           | 1,1862  |
| 402 | 16933931 | PES1           | pescadillo ribosomal biogenesis factor 1                                                             | -1,2236 |
| 403 | 16937505 | FANCD2         | Fanconi anemia, complementation group D2                                                             | 1,1798  |
| 404 | 16669796 | TXNIP          | thioredoxin interacting protein /// thioredoxin-interacting protein-like                             | 2,3283  |

|     |          |          |                                                                                                                 |         |
|-----|----------|----------|-----------------------------------------------------------------------------------------------------------------|---------|
| 405 | 16801179 | MAPK6    | mitogen-activated protein kinase 6                                                                              | -1,6958 |
| 406 | 16664118 | NASP     | nuclear autoantigenic sperm protein (histone-binding) /// nuclear autoantigenic sperm protein (histone-binding) | -1,6875 |
| 407 | 16740956 | POLD4    | polymerase (DNA-directed), delta 4, accessory subunit                                                           | 1,6832  |
| 408 | 17008092 | PIM1     | pim-1 oncogene                                                                                                  | -1,6148 |
| 409 | 16922584 | CHAF1B   | chromatin assembly factor 1, subunit B (p60)                                                                    | -1,6991 |
| 410 | 16860737 | PDCD2L   | programmed cell death 2-like                                                                                    | -1,7191 |
| 411 | 16857258 | UHRF1    | ubiquitin-like with PHD and ring finger domains 1 /// ubiquitin-like with PHD and ring finger domains 1         | -1,5932 |
| 412 | 16962493 | RFC4     | replication factor C (activator 1) 4, 37kDa                                                                     | -1,3639 |
| 413 | 16713230 | PARD3    | par-3 partitioning defective 3 homolog (C. elegans)                                                             | 1,3869  |
| 414 | 16857192 | CHAF1A   | chromatin assembly factor 1, subunit A (p150)                                                                   | -1,4802 |
| 415 | 17058617 | RFC2     | replication factor C (activator 1) 2, 40kDa                                                                     | -1,4019 |
| 416 | 17002777 | STK10    | serine/threonine kinase 10                                                                                      | 1,4566  |
| 417 | 16884956 | STEAP3   | STEAP family member 3, metalloreductase                                                                         | -1,4579 |
| 418 | 16856980 | HMG20B   | high mobility group 20B                                                                                         | 1,3061  |
| 419 | 16679411 | EXO1     | exonuclease 1                                                                                                   | -1,3441 |
| 420 | 16794256 | ERH      | enhancer of rudimentary homolog (Drosophila)                                                                    | -1,3507 |
| 421 | 16985353 | ERBB2IP  | erbb2 interacting protein                                                                                       | 1,3285  |
| 422 | 17005234 | E2F3     | E2F transcription factor 3                                                                                      | 1,2681  |
| 423 | 16833263 | LIG3     | ligase III, DNA, ATP-dependent /// ligase III, DNA, ATP-dependent                                               | 1,2552  |
| 424 | 16845172 | PSMC3IP  | PSMC3 interacting protein                                                                                       | -1,3339 |
| 425 | 17007910 | MAPK13   | mitogen-activated protein kinase 13                                                                             | 1,2889  |
| 426 | 17068093 | TACC1    | transforming, acidic coiled-coil containing protein 1                                                           | -1,3935 |
| 427 | 16716027 | ANXA11   | annexin A11                                                                                                     | 1,2534  |
| 428 | 17046041 | IKZF1    | IKAROS family zinc finger 1 (Ikaros)                                                                            | 1,2886  |
| 429 | 17104082 | APEX2    | APEX nuclease (apurinic/aprimidinic endonuclease) 2                                                             | -1,2737 |
| 430 | 16828153 | TXNL4B   | thioredoxin-like 4B                                                                                             | -1,3035 |
| 431 | 16901593 | sep-01   | septin 10                                                                                                       | 1,3109  |
| 432 | 16969414 | TET2     | tet methylcytosine dioxygenase 2                                                                                | 1,2227  |
| 433 | 16773946 | RFC3     | replication factor C (activator 1) 3, 38kDa                                                                     | -1,3430 |
| 434 | 16702685 | SUV39H2  | suppressor of variegation 3-9 homolog 2 (Drosophila)                                                            | -1,2245 |
| 435 | 16886503 | RIF1     | RAP1 interacting factor homolog (yeast)                                                                         | -1,3189 |
| 436 | 17009918 | PTP4A1   | protein tyrosine phosphatase type IVA, member 1                                                                 | -1,1934 |
| 437 | 17109716 | RPS6KA3  | ribosomal protein S6 kinase, 90kDa, polypeptide 3                                                               | -1,2300 |
| 438 | 17057174 | POLD2    | polymerase (DNA directed), delta 2, accessory subunit                                                           | -1,1924 |
| 439 | 16960517 | SIAH2    | siah E3 ubiquitin protein ligase 2                                                                              | -1,2119 |
| 440 | 16916901 | RASSF2   | Ras association (RalGDS/AF-6) domain family member 2                                                            | -1,1804 |
| 441 | 16937035 | ARL8B /  | ADP-ribosylation factor-like 8B                                                                                 | -1,2276 |
| 442 | 17077135 | RB1CC1   | RB1-inducible coiled-coil 1                                                                                     | 1,2178  |
| 443 | 16704320 | RASSF4   | Ras association (RalGDS/AF-6) domain family member 4                                                            | 1,1767  |
| 444 | 16757687 | RFC5     | replication factor C (activator 1) 5, 36.5kDa                                                                   | -1,2192 |
| 445 | 17098932 | C9orf114 | chromosome 9 open reading frame 114                                                                             | -1,1867 |
| 446 | 16882304 | USP39    | ubiquitin specific peptidase 39                                                                                 | -1,1906 |
| 447 | 16915173 | RBM38    | RNA binding motif protein 38                                                                                    | -1,1508 |
